# Supplementary material
Source: PubMed Central journal article supplement (PMC2705704)
Supplement: 11060_2009_9919_MOESM1_ESM.pdf [file 11060_2009_9919_MOESM1_ESM.pdf]

## Supplementary Figure 1

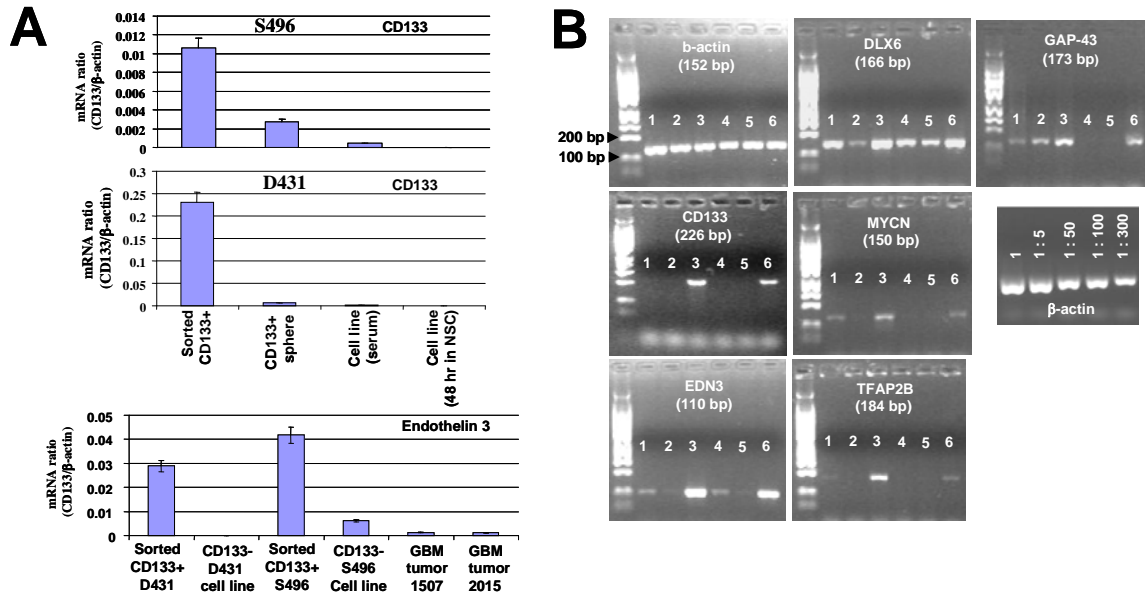

**Supplementary Figure 1.** Verification of molecular markers expressed in CD133+ GBM cells using RT-PCR analysis. A. Real-time quantitative RT-PCR analysis of CD133 and endothelin 3 (EDN3) mRNA expression in the indicated cell cultures. The quantitation of specific transcripts in cells was calculated and expressed by the specific mRNA ratio to  $\beta$ -actin. B. Semi-quantitative analysis of indicated markers expressed in the following cultures: lane 1 (L1): D431 cell line (serum), L2: D431 cell line switched to NSC culture condition for 48 hr, L3: Purified CD133+ D431GBM cells sorted from CD133+ GBM sphere culture, L4: S496 cell line (serum), L5: S496 cell line switched to NSC culture condition for 48 hr, L6: Purified CD133+ S496 GBM cells sorted from the CD133+ GBM sphere culture.

## Supplementary Figure 2

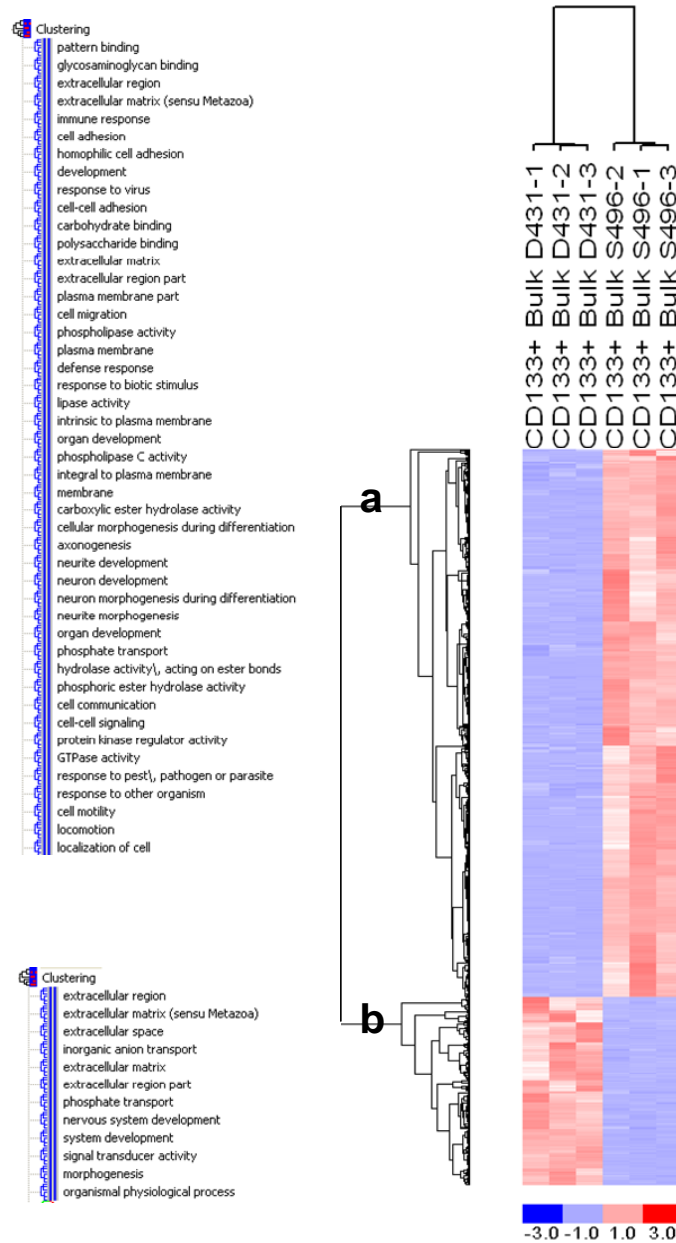

**Supplementary Figure 2.** Two-way unsupervised gene and sample clustering of CD133+ D431 GBM spheres and CD133+ S496 GBM spheres. The analysis was based on a cutoff of 4-fold increase or decrease in relative expression in CD133+ D431 GBM spheres compared to CD133+ S496 GBM spheres ( $P < 0.05$ ). All plots show normalized gene expression values converted into a heat map.

## Supplementary Table 1

### Gene function categories of gene clusters of 64 common genes determined in both CD133+ D431 and CD133+ S496 cells

#### (Hierarchical clustering

Read in genes listed in file E:\New Folder\Table 1 common genes for clustering.txt...

Found 64 genes

Begin clustering...

Calculate distance 60

Find nearest neighbor 60

Merge node 56

Calculate distance 20

Find nearest neighbor 20

Merge node 16

Finding significant Gene Ontology clusters...

Found 21 "signal transducer activity" genes in a 64-cluster (all: 5865/36426, PValue: 0.000741)

Found 16 "receptor activity" genes in a 64-cluster (all: 3593/36426, PValue: 0.000378)

Found 11 "transmembrane receptor activity" genes in a 64-cluster (all: 2066/36426, PValue: 0.000875)

Found 7 "ion channel activity" genes in a 64-cluster (all: 771/36426, PValue: 0.000404)

Found 4 "extracellular ligand-gated ion channel activity" genes in a 64-cluster (all: 133/36426,

PValue: 0.000091)

Found 12 "extracellular region" genes in a 64-cluster (all: 2275/36426, PValue: 0.000538)

Found 24 "development" genes in a 64-cluster (all: 4817/36426, PValue: 0.000001)

Found 17 "nervous system development" genes in a 64-cluster (all: 1242/36426, PValue: 0.000000)

Found 7 "channel or pore class transporter activity" genes in a 64-cluster (all: 888/36426, PValue:

0.000928)

Found 7 "alpha-type channel activity" genes in a 64-cluster (all: 834/36426, PValue: 0.000643)

Found 5 "ligand-gated ion channel activity" genes in a 64-cluster (all: 214/36426, PValue: 0.000038)

Found 6 "neurotransmitter receptor activity" genes in a 64-cluster (all: 163/36426, PValue: 0.000000)

Found 7 "extracellular matrix" genes in a 64-cluster (all: 871/36426, PValue: 0.000830)

Found 6 "neurotransmitter binding" genes in a 64-cluster (all: 167/36426, PValue: 0.000001)

Found 5 "synapse part" genes in a 64-cluster (all: 187/36426, PValue: 0.000020)

Found 5 "synapse" genes in a 64-cluster (all: 291/36426, PValue: 0.000163)

Found 5 "postsynaptic membrane" genes in a 64-cluster (all: 168/36426, PValue: 0.000012)

Found 17 "system development" genes in a 64-cluster (all: 1248/36426, PValue: 0.000000)

Found 5 "extracellular matrix part" genes in a 63-cluster (all: 438/36426, PValue: 0.000974)

Found 5 "cation channel activity" genes in a 40-cluster (all: 569/36426, PValue: 0.000383)

Found 23 "membrane" genes in a 40-cluster (all: 11696/36426, PValue: 0.000807)

Found 20 "integral to membrane" genes in a 40-cluster (all: 8595/36426, PValue: 0.000251)

Found 20 "intrinsic to membrane" genes in a 40-cluster (all: 8612/36426, PValue: 0.000258)

Found 21 "membrane part" genes in a 40-cluster (all: 9371/36426, PValue: 0.000267)

## Supplementary Table 2

Supplementary Table 2. Distinct genes expressed at higher levels in CD133+ D431 GBM cells compared with autologous CD133-GBM cells cultured in serum-containing media \*

| Gene                                                 | Symbol     | Gene I.D. | Fold change | P value  | Functional involvement                                           |
|------------------------------------------------------|------------|-----------|-------------|----------|------------------------------------------------------------------|
| heparan sulfate 6-O-sulfotransferase 2               | HS6ST2     | 90161     | 175.31      | 0.002817 | biosynthesis of heparan sulfate; FGF-2 signaling                 |
| ABI gene family, member 3 (NESH) binding protein     | ABI3BP     | 25890     | 129.49      | 0.007108 | tumor suppressor                                                 |
| transient receptor potential cation channel          | TRPA1      | 8989      | 128.20      | 0.008552 | highly expressed in sensory neurons; pain sensation              |
| coagulation factor XIII, A1 polypeptide              | F13A1      | 2162      | 83.67       | 0.000529 | stabilizes the fibrin clot; tissue regeneration                  |
| reticulin 1                                          | RTN1       | 6252      | 71.49       | 0.001792 | neuroendocrine secretion                                         |
| sidekick homolog 2 (chicken)                         | SDK2       | 54549     | 68.99       | 0.005304 | cell adhesion protein that guides axonal terminals               |
| EPH receptor B1                                      | EPHB1      | 2047      | 56.20       | 0.0025   | regulates proliferation/migration/polarity of neural progenitors |
| neuronal growth regulator 1                          | NEGR1      | 257194    | 55.06       | 0.003549 | trans-neural growth-promoting factor                             |
| leucine rich repeat containing 7                     | LRRC7      | 57554     | 45.36       | 0.023261 | organization of synaptic cell-cell contacts                      |
| MEGF10 protein                                       | MEGF10     | 84466     | 45.17       | 0.014488 | engulfment of apoptotic corpses                                  |
| glutamate decarboxylase 1 (brain, 67kDa)             | GAD1       | 2571      | 43.24       | 0.007724 | catalyzes the production of gamma-aminobutyric acid              |
| Scm-like with four mbt domains 2                     | SFMBT2     | 57713     | 42.91       | 0.004102 | development of the brain                                         |
| POU domain, class 3, transcription factor 2          | POU3F2     | 5454      | 39.87       | 0.011541 | transcription factors in neurogenesis                            |
| testis derived transcript (3 LIM domains)            | TES        | 26136     | 31.88       | 0.025432 | candidate tumor suppressor gene                                  |
| Ksp37 protein                                        | KSP37      | 83888     | 30.19       | 0.008142 | protein produced by CD4 and cytotoxic lymphocytes                |
| v-myc myelocytomatosis viral related oncogene        | MYCN       | 4613      | 30.06       | 0.007178 | embryonal tumor initiation factor                                |
| Calcium/calmodulin-dependent protein kinase IV       | CAMK4      | 814       | 29.17       | 0.002284 | Ca(2+)-dependent transcriptional regulation                      |
| chemokine (C-C motif) ligand 11                      | CCL11      | 6356      | 27.94       | 0.034323 | prevention of acute inflammation                                 |
| neuroigin 4, X-linked                                | NLGN4X     | 57502     | 26.53       | 0.001435 | neuronal cell surface protein involved in cell-cell-interactions |
| protein phosphatase 1E (PP2C domain containing)      | PPM1E      | 22843     | 26.03       | 0.009441 | inactivates multifunctional CaM kinases                          |
| orthodenticle homolog 2 (Drosophila)                 | OTX2       | 5015      | 25.97       | 0.043899 | brain and sensory organ development                              |
| hairly/enhancer-of-split related with YRPW motif 1   | HEY1       | 23462     | 25.20       | 0.001073 | mediates notch signaling in maintaining neural precursor cells   |
| Phosphodiesterase 4D, cAMP-specific                  | PDE4D      | 5144      | 24.00       | 0.002695 | degrades the second messenger cAMP                               |
| transmembrane protein                                | TMEFF2     | 23671     | 23.33       | 0.000012 | inhibiting cell growth; suppressed by c-Myc expression           |
| dystrophin                                           | DMD        | 1756      | 18.39       | 0.000195 | brain development, synapse formation, and plasticity             |
| complement factor H                                  | CFH        | 3075      | 14.65       | 0.014121 | inhibition of complement activation                              |
| protein tyrosine phosphatase, receptor type, O       | PTPRO      | 5800      | 14.60       | 0.006974 | inhibition of cell proliferation and induction of cell apoptosis |
| cholinergic receptor, nicotinic, alpha polypeptide 3 | CHRNA5     | 1136      | 14.52       | 0.004947 | ligand-binding subunit of the ganglionic type nicotinic receptor |
| gastrulation brain homeo box 2                       | GBX2       | 2637      | 12.26       | 0.022769 | early patterning of the vertebrate brain                         |
| glutamate receptor, metabotropic 1                   | GRM1       | 2911      | 12.01       | 0.006675 | excitatory neurotransmitter in the central nervous system        |
| amiloride-sensitive cation channel 1, neuronal       | ACCN1      | 40        | 11.80       | 0.001059 | neurotransmission                                                |
| ras homolog gene family, member U                    | RHOU       | 58480     | 10.73       | 0.002902 | induce filopodium formation and stress fiber dissolution         |
| potassium voltage-gated channel, KQT-like subfamily  | KCNQ2      | 3785      | 10.67       | 0.021453 | regulation of neuronal excitability                              |
| syntrophin, gamma 1                                  | SNTG1      | 54212     | 10.59       | 0.022576 | dystrophin-binding proteins localized in neuronal cells          |
| phosphodiesterase 7B                                 | PDE7B      | 27115     | 9.85        | 0.015903 | degrades the phosphodiester bond in cAMP                         |
| Protein kinase inhibitor alpha                       | PKIA       | 5569      | 9.24        | 0.002198 | cAMP-dependent protein kinase inhibitor                          |
| vasohibin 1                                          | VASH1      | 22846     | 9.15        | 0.007076 | inhibitory activity of angiogenesis                              |
| MCF.2 cell line derived transforming sequence        | MCF2       | 4168      | 8.15        | 0.029575 | GDP-GTP exchange factors; directional cell migration             |
| synaptopodin 2                                       | SYNPO2     | 171024    | 7.26        | 0.003422 | tumor suppressor gene; limit tumor growth                        |
| ribonuclease T2                                      | RNASET2    | 8635      | 7.16        | 0.000609 | antitumorigenic and antiangiogenic effects                       |
| v-myb myeloblastosis viral oncogene homolog (avian)  | MYB        | 4602      | 6.24        | 0.036489 | intrinsic factor for neural progenitor cell proliferation        |
| tetraspanin 12                                       | TSPAN12.31 | 23554     | 6.20        | 0.000666 | regulation of cell development, growth and motility              |
| inter-alpha (globulin) inhibitor H5                  | ITIH5      | 80760     | 6.03        | 0.000382 | tumour suppressor; growth suppression                            |
| dual specificity phosphatase 6                       | DUSP6      | 1848      | 5.59        | 0.000093 | suppress growth and differentiation                              |
| Slit homolog 2 (Drosophila)                          | SLIT2      | 9353      | 5.33        | 0.000142 | inhibits neurite outgrowth; hypermethylation in gliomas          |
| frizzled homolog 1 (Drosophila)                      | FZD1       | 8321      | 5.09        | 0.003911 | Wnt/planar cell polarity                                         |
| Mdm2, transformed 3T3 cell double minute 2,          | MDM2       | 4193      | 5.08        | 0.02827  | inhibits TP53 mediated cell cycle arrest and apoptosis           |
| LAG1 longevity assurance homolog 6 (S. cerevisiae)   | LASS6      | 253782    | 4.91        | 0.008114 | ceramide synthesis                                               |
| Stanniocalcin 1                                      | STC1       | 6781      | 4.75        | 0.027726 | a paracrine regulator of growth plate chondrogenesis             |
| interferon induced transmembrane protein 1 (9-27)    | IFITM1     | 8519      | 4.64        | 0.005911 | immune suppressive molecules                                     |

\*analysis was based on a cutoff of 3-fold increase in relative expression compared to autologous CD133- GBM cells cultured in serum (p &lt;0.05).

## Supplementary Table 3

Supplementary Table 3. Distinct genes expressed at higher levels in CD133+ S496 GBM cells compared with autologous CD133-GBM cells cultured in serum-containing media\*

| Gene                                                         | Symbol     | Gene I.D. | Fold change | P value  | Functional involvement                                           |
|--------------------------------------------------------------|------------|-----------|-------------|----------|------------------------------------------------------------------|
| fatty acid binding protein 7, brain                          | FABP7      | 2173      | 126.26      | 0.015286 | establishes radial glial fiber system; malignant glioblastoma    |
| solute carrier family 17                                     | SLC17A6    | 57084     | 79.82       | 0.047145 | transports glutamate in synaptic vesicles                        |
| endomucin                                                    | EMCN       | 51705     | 56.08       | 0.030959 | inhibits interaction between cells and the extracellular matrix  |
| SPARC-like 1 (mast9, hev1n)                                  | SPARCL1    | 8404      | 45.50       | 0.01794  | radial glial surface antigen; tumor suppressor; antiangiogenesis |
| FRAS1 related extracellular matrix protein 2                 | FREM2      | 341640    | 45.46       | 0.001827 | maintenance of the integrity of epithelium                       |
| NEL-like 2 (chicken) /// NEL-like 2 (chicken)                | NELL2      | 4753      | 43.48       | 0.01664  | motor and sensory neuron genesis                                 |
| glypican 3                                                   | GPC3       | 2719      | 41.15       | 0.025203 | cell polarity and movements; suppress cell proliferation         |
| Adrenergic, alpha-1A-, receptor                              | ADRA1A     | 148       | 34.01       | 0.043709 | suppresses growth and proliferation                              |
| zinc finger protein 423                                      | ZNF423     | 23090     | 33.71       | 0.012303 | DNA binding-dependent transcriptional repressor                  |
| Prostaglandin E receptor 3 (subtype EP3)                     | PTGER3     | 5733      | 28.67       | 0.012303 | decreases intracellular cAMP levels; growth inhibition           |
| MyoD family inhibitor                                        | MDF1       | 4188      | 23.85       | 0.020999 | interferes with myogenic factor function                         |
| SIAT7E/MGC3184/ST6GalNAcV                                    | ST6GALNAc5 | 81849     | 21.56       | 0.010969 | biosynthesis of ganglioside GD1a                                 |
| Leucine rich repeat neuronal 6C                              | LINGO2     | 158038    | 20.67       | 0.014161 | express in limbic system and neocortex                           |
| neurotensin                                                  | NTS        | 4922      | 19.94       | 0.014243 | regulates the growth of intestinal cells and fat metabolism      |
| inhibitor of DNA binding 4                                   | ID4        | 3400      | 19.55       | 0.027988 | tumor suppressor gene                                            |
| Hyaluronan and proteoglycan link protein 1                   | HAPLN1     | 1404      | 19.05       | 0.018423 | stabilizes cartilage extracellular matrix.                       |
| integral membrane protein 2A                                 | ITM2A      | 9452      | 18.46       | 0.032728 | marker gene of chondrogenic/osteoblastic cells                   |
| gastrin-releasing peptide                                    | GRP        | 2922      | 18.24       | 0.018365 | stimulates gastrointestinal hormones                             |
| angiotensin II receptor, type 1                              | AGTR1      | 185       | 18.05       | 0.014783 | modulation of nervous system activity, cardiac contractility     |
| DIRAS family, GTP-binding RAS-like 3                         | DIRAS3     | 9077      | 15.68       | 0.036822 | growth suppression; tumor suppressor                             |
| leucine rich repeat neuronal 1                               | LRRN1      | 57633     | 14.26       | 0.047712 | cell-cell recognition pathways in neuroepithelial cells.         |
| nuclear factor I/A                                           | NFIA       | 4774      | 13.84       | 0.02239  | abrogation of neurogenesis to a generic program of gliogenesis   |
| angiopoietin-like 1                                          | ANGPTL1    | 9068      | 13.66       | 0.047674 | antiangiogenesis; antitumor growth                               |
| dynammin 3                                                   | DNM3       | 26052     | 13.27       | 0.000407 | vesicular trafficking processes                                  |
| chromosome 6 open reading frame 32                           | C6orf32    | 9750      | 13.06       | 0.000044 | cytoskeletal rearrangement and filopodia formation               |
| lipase, endothelial                                          | LIPG1      | 9388      | 12.98       | 0.002796 | lipoprotein metabolism and vascular biology                      |
| potassium conductance calcium-activated channel              | KCNN2      | 3781      | 12.78       | 0.037762 | sustained Ca <sup>2+</sup> influx in the G0/G1 phase             |
| coagulation factor II (thrombin) receptor-like 2             | F2RL2      | 2151      | 12.55       | 0.000002 | stimulates phosphoinositide hydrolysis                           |
| fibrillin 2 (congenital contractural arachnodactyly)         | FBN2       | 2201      | 12.29       | 0.027358 | skeletal development                                             |
| ras homolog gene family, member J                            | RHOJ       | 57381     | 12.29       | 0.01132  | cell proliferation, motility and cell polarity                   |
| collagen, type VIII, alpha 2                                 | COL8A2     | 1296      | 12.20       | 0.038404 | membrane of corneal endothelial cells (neural crest origin)      |
| sorbin and SH3 domain containing 1                           | SORBS1     | 10580     | 12.06       | 0.011481 | formation actin stress fibers and focal adhesion                 |
| protocadherin 20                                             | PCDH20     | 64881     | 11.74       | 0.015779 | specific cell-cell connections; tumor suppressor                 |
| latrophilin 3                                                | LPHN3      | 23284     | 11.18       | 0.016641 | cell adhesion and signal transduction                            |
| carbonic anhydrase II                                        | CA2        | 760       | 10.95       | 0.017791 | bone resorption and osteoclast differentiation                   |
| Protease, serine, 12 (neurotrypsin, motopsin)                | PRSS12     | 8492      | 9.92        | 0.017152 | normal synaptic function                                         |
| protein kinase inhibitor beta                                | PKIB       | 5570      | 9.57        | 0.016691 | inhibit cAMP-dependent protein kinase activity                   |
| thymosin-like 8                                              | TMSL8      | 11013     | 9.54        | 0.008662 | promotes cell migration; neuroblastoma marker                    |
| visinin-like 1                                               | VSNL1      | 7447      | 9.31        | 0.00788  | neuronal calcium sensor proteins                                 |
| mab-21-like 2 (C. elegans)                                   | MAB21L2    | 10586     | 9.15        | 0.00496  | antagonizes the effects of bone morphogenetic protein 4          |
| solute carrier family 7                                      | SLC7A2     | 6542      | 8.85        | 0.003108 | transports the cationic amino acids                              |
| butyrylcholinesterase                                        | BCHE       | 590       | 8.81        | 0.000087 | hydrolysis of the neurotransmitter acetylcholine                 |
| collagen, type XI, alpha 1                                   | COL11A1    | 1301      | 8.73        | 0.008972 | an integral component of the cartilage fibrillar network         |
| zinc finger protein 6 (CMPX1)                                | ZNF711     | 7552      | 8.57        | 0.020772 | highly expressed in brain                                        |
| potassium voltage-gated channel, subfamily G, member 1       | KCNG1      | 3755      | 8.44        | 0.000397 | neurotransmitter release, neuronal excitability,                 |
| ST8 alpha-N-acetyl-neuraminide alpha-2,8-sialyltransferase 2 | ST8SIA2    | 8128      | 8.44        | 0.021621 | development and sialic acid synthesis on NCAM                    |
| fibroblast growth factor receptor 2                          | FGFR2      | 2263      | 8.39        | 0.000014 | maintaining the neural stem cell pool                            |
| E2a-Pbx1-associated protein                                  | ANKS1B     | 56899     | 8.22        | 0.001655 | blocks differentiation of myeloid progenitors                    |
| chondroitin sulfate synthase 3                               | CHSY3      | 337876    | 8.13        | 0.007312 | neuritogenesis.                                                  |
| dachsous 1 (Drosophila)                                      | DCHS1      | 8642      | 8.11        | 0.006951 | controls the establishment of planar cell polarity               |

\*analysis was based on a cutoff of 3-fold increase in relative expression compared to autologous CD133- GBM cells (p &lt; 0.05).

## Supplementary Table 4

### Gene function categories of gene clusters of top 30 modulated genes in CD133- D431 GBM daughter cells when compared to CD133+ GBM daughter cells

**(Hierarchical clustering)**

Read in genes listed in file C:\Documents and Settings\Cho-Lea Tso\Desktop\updated JNO\Table 2\paper-  
Table 2, 30 gene changes in D431.txt...

Found 30 genes

Begin clustering...

Calculate distance 20

Find nearest neighbor 20

Merge node 10

Finding significant Gene Ontology clusters...

Found 10 "extracellular region" genes in a 28-cluster (all: 2275/36426, PValue: 0.000004)

Found 5 "extracellular space" genes in a 28-cluster (all: 954/36426, PValue: 0.000726)

Found 6 "extracellular matrix" genes in a 28-cluster (all: 871/36426, PValue: 0.000044)

Found 7 "extracellular region part" genes in a 28-cluster (all: 1548/36426, PValue: 0.000133)

Found 4 "extracellular matrix (sensu Metazoa)" genes in a 15-cluster (all: 676/36426, PValue:  
0.000136)

## Supplementary Table 5

### Gene function categories of gene clusters of top 30 modulated genes in CD133- S496 GBM daughter cells when compared to CD133+ S496GBM daughter cells

**(Hierarchical clustering**

Read in genes listed in file C:\Documents and Settings\Cho-Lea Tso\Desktop\updated JNO\Table 2\paper-Table 2, 30 gene changes in S496.txt...

Found 30 genes

Begin clustering...

Calculate distance 20

Find nearest neighbor 20

Merge node 10

Finding significant Gene Ontology clusters...

Found 5 "cell fraction" genes in a 30-cluster (all: 1982/36426, PValue: 0.021701)

Found 8 "plasma membrane" genes in a 30-cluster (all: 4326/36426, PValue: 0.020780)

Found 6 "integral to plasma membrane" genes in a 30-cluster (all: 2903/36426, PValue: 0.028753)

Found 4 "morphogenesis" genes in a 30-cluster (all: 1573/36426, PValue: 0.038847)

Found 6 "intrinsic to plasma membrane" genes in a 30-cluster (all: 2922/36426, PValue: 0.029574)

Found 9 "protein complex" genes in a 30-cluster (all: 4863/36426, PValue: 0.013675)

Found 7 "plasma membrane part" genes in a 30-cluster (all: 3602/36426, PValue: 0.024394)

Found 4 "neurophysiological process" genes in a 30-cluster (all: 1413/36426, PValue: 0.027684)

Found 7 "cytoplasm" genes in a 15-cluster (all: 8676/36426, PValue: 0.044578)

Found 7 "intracellular part" genes in a 8-cluster (all: 18678/36426, PValue: 0.041092)

Found 5 "membrane" genes in a 7-cluster (all: 11696/36426, PValue: 0.038580)

**Supplementary Table 6. Differential gene expression  
in CD133+ D431 GBM spheres versus CD133+ S496 GBM spheres**

| gene                                                                 | CD133+ D431 spheres/CD133+S496 spheres | LocusLink | fold change | P value  |
|----------------------------------------------------------------------|----------------------------------------|-----------|-------------|----------|
| Hypothetical protein FLJ36031                                        |                                        | 168455    | 100.52      | 0.009805 |
| chitinase 3-like 1 (cartilage glycoprotein-39)                       |                                        | 1116      | 91.68       | 0.03526  |
| cytochrome c oxidase subunit VIIa polypeptide 1 (muscle)             |                                        | 1346      | 67.18       | 0.002736 |
| hydroxysteroid (11-beta) dehydrogenase 1                             |                                        | 3290      | 64.75       | 0.043937 |
| coagulation factor XIII, A1 polypeptide                              |                                        | 2162      | 55.9        | 0.023753 |
| Transcribed locus                                                    |                                        |           | 55.85       | 0.028174 |
| RAB3A interacting protein (rabin3)                                   |                                        | 117177    | 51.66       | 0.019807 |
| CDNA clone IMAGE:5261489                                             |                                        |           | 45.2        | 0.03861  |
| Mdm2, transformed 3T3 cell double minute 2, p53 binding protein (m   |                                        | 4193      | 43.68       | 0.023129 |
| delta-like 1 (Drosophila)                                            |                                        | 28514     | 41.88       | 0.034983 |
| leucine rich repeat containing 7                                     |                                        | 57554     | 34.17       | 0.033767 |
| family with sequence similarity 20, member A                         |                                        | 54757     | 33.87       | 0.01041  |
| cytochrome b-245, alpha polypeptide                                  |                                        | 1535      | 31.05       | 0.002295 |
| chemokine (C-C motif) ligand 11                                      |                                        | 6356      | 30.93       | 0.025824 |
| MEGF10 protein                                                       |                                        | 84466     | 27.62       | 0.00955  |
| ankylosis, progressive homolog (mouse)                               |                                        | 56172     | 26.47       | 0.012389 |
| family with sequence similarity 11, member B                         |                                        | 79134     | 22.38       | 0.039456 |
| mucin 15                                                             |                                        | 143662    | 21.2        | 0.013264 |
| G protein-coupled receptor 68                                        |                                        | 8111      | 20.05       | 0.000176 |
| tryptophan 2,3-dioxygenase                                           |                                        | 6999      | 19.74       | 0.049863 |
| ring finger protein 149                                              |                                        | 284996    | 18.64       | 0.00047  |
| chromosome 20 open reading frame 103                                 |                                        | 24141     | 18.4        | 0.027346 |
| gamma-aminobutyric acid (GABA) receptor, rho 1                       |                                        | 2569      | 17.94       | 0.023181 |
| chromosome 13 open reading frame 18                                  |                                        | 80183     | 16.78       | 0.005736 |
| ATP-binding cassette, sub-family A (ABC1), member 1                  |                                        | 19        | 16.08       | 0.010759 |
| multiple C2-domains with two transmembrane regions 2                 |                                        | 55784     | 15.65       | 0.010809 |
| Fibroblast growth factor receptor substrate 2                        |                                        | 10818     | 15.15       | 0.012426 |
| Transcribed locus                                                    |                                        |           | 14.15       | 0.002773 |
| platelet-derived growth factor alpha polypeptide                     |                                        | 5154      | 13.37       | 0.039304 |
| F-box and leucine-rich repeat protein 16                             |                                        | 146330    | 13.31       | 0.047391 |
| sparc/osteonectin, cwcv and kazal-like domains proteoglycan (testic  |                                        | 6695      | 12.78       | 0.022073 |
| HSPC171 protein                                                      |                                        | 29100     | 12.61       | 0.000237 |
| zinc finger protein 415                                              |                                        | 55786     | 12.3        | 0.014314 |
| solute carrier family 26, member 4                                   |                                        | 5172      | 12.25       | 0.049675 |
| hypothetical protein FLJ14213                                        |                                        | 79899     | 12.03       | 0.000012 |
| gb:AI332764 /DB_XREF=gi:4069323 /DB_XREF=qp92h04.x1 /CLONE=IMAGE     |                                        |           | 11.97       | 0.032457 |
| hypothetical protein MGC72075                                        |                                        | 340277    | 11.87       | 0.049728 |
| myosin IB                                                            |                                        | 4430      | 11.83       | 0.04198  |
| BAI1-associated protein 2-like 1                                     |                                        | 55971     | 11.62       | 0.047216 |
| Fas apoptotic inhibitory molecule 2                                  |                                        | 23017     | 11.59       | 0.014841 |
| transmembrane protein with EGF-like and two follistatin-like domains |                                        | 23671     | 11.17       | 0.012402 |
| CD82 antigen                                                         |                                        | 3732      | 11          | 0.031066 |
| collapsin response mediator protein 1                                |                                        | 1400      | 10.81       | 0.023307 |
| Cleavage and polyadenylation specific factor 6, 68kDa                |                                        | 11052     | 10.6        | 0.002071 |
| ribosomal protein L39-like                                           |                                        | 116832    | 10.5        | 0.000438 |



|                                                                         |              |       |          |
|-------------------------------------------------------------------------|--------------|-------|----------|
| retinoblastoma 1 (including osteosarcoma)                               | 5925         | 10.05 | 0.025829 |
| glutathione S-transferase theta 1                                       | 2952         | 10    | 0.000766 |
| likely ortholog of mouse limb-bud and heart gene /// likely ortholog of | 81606        | 9.15  | 0.025396 |
| Transcribed locus                                                       |              | 9.15  | 0.039904 |
| Cbp/p300-interacting transactivator, with Glu/Asp-rich carboxy-termi    | 4435         | 9.11  | 0.028626 |
| cathepsin B                                                             | 1508         | 8.92  | 0.012927 |
| hypothetical protein MGC5370                                            | 84825        | 8.7   | 0.000046 |
| Family with sequence similarity 20, member A                            | 54757        | 8.66  | 0.010482 |
| protocadherin beta 5                                                    | 26167        | 8.61  | 0.002226 |
| neuronal growth regulator 1                                             | 257194       | 8.44  | 0.000116 |
| similar to hypothetical protein                                         | 221091       | 8.37  | 0.040003 |
| tripartite motif-containing 4                                           | 89122        | 8.03  | 0.002782 |
| chromosome 10 open reading frame 58 /// chromosome 10 open rea          | 84293        | 8.02  | 0.015894 |
| tubulin, beta 6                                                         | 84617        | 8.01  | 0.02216  |
| chromosome 10 open reading frame 58                                     | 84293        | 7.84  | 0.007907 |
| Sema domain, immunoglobulin domain (Ig), short basic domain, sec        | 10371        | 7.75  | 0.028314 |
| Transcribed locus                                                       |              | 7.7   | 0.040105 |
| interleukin 27 receptor, alpha                                          | 9466         | 7.68  | 0.015561 |
| transforming growth factor, beta 1 (Camurati-Engelmann disease)         | 7040         | 7.58  | 0.014125 |
| von Willebrand factor A domain containing 1                             | 64856        | 7.52  | 0.002005 |
| CDNA FLJ41269 fis, clone BRAMY2036079                                   |              | 7.52  | 0.046837 |
| MRNA; clone CD 43T7                                                     |              | 7.41  | 0.016015 |
| biglycan                                                                | 633          | 7.32  | 0.046886 |
| biglycan /// serologically defined colon cancer antigen 33              | 10194 /// 6: | 7.28  | 0.006976 |
| carbamoyl-phosphate synthetase 1, mitochondrial                         | 1373         | 7.26  | 0.044476 |
| MRNA; clone CD 43T7                                                     |              | 7.15  | 0.014902 |
| CDNA FLJ42287 fis, clone TLIVE2005866                                   |              | 7.13  | 0.008599 |
| hydrolethalus syndrome 1                                                | 219844       | 7     | 0.008569 |
| chromosome 6 open reading frame 160                                     | 387066       | 6.99  | 0.005061 |
| adenylate cyclase 1 (brain)                                             | 107          | 6.92  | 0.000028 |
| endothelial differentiation, sphingolipid G-protein-coupled receptor, 3 | 1903         | 6.87  | 0.038541 |
| Glioma amplified sequence 64                                            |              | 6.87  | 0.04478  |
| CDNA FLJ26796 fis, clone PRS05079                                       |              | 6.78  | 0.046183 |
| Homo sapiens, clone IMAGE:4398657, mRNA                                 |              | 6.71  | 0.038834 |
| FLJ20160 protein                                                        | 54842        | 6.64  | 0.000296 |
| dispatched homolog 2 (Drosophila)                                       | 85455        | 6.53  | 0.048561 |
| ABI gene family, member 3 (NESH) binding protein                        | 25890        | 6.51  | 0.041326 |
| programmed cell death 6                                                 | 10016        | 6.46  | 0.005711 |
| likely ortholog of mouse neighbor of Punc E11                           | 57722        | 6.45  | 0.009625 |
| chromogranin B (secretogranin 1)                                        | 1114         | 6.4   | 0.042886 |
| collagen and calcium binding EGF domains 1                              | 147372       | 6.23  | 0.010205 |
| KIAA1324                                                                | 57535        | 6.22  | 0.016084 |
| hypothetical protein MGC5370                                            | 84825        | 6.21  | 0.000198 |
| chromosome 20 open reading frame 22                                     | 26090        | 6.17  | 0.042111 |
| HMG-box transcription factor 1                                          | 26959        | 6.12  | 0.032318 |
| adenylate cyclase 1 (brain)                                             | 107          | 5.99  | 0.001425 |
| prostaglandin E receptor 4 (subtype EP4)                                | 5734         | 5.96  | 0.001773 |
| stathmin-like 3                                                         | 50861        | 5.88  | 0.002361 |
| chromosome 6 open reading frame 52                                      | 347744       | 5.84  | 0.031479 |
| Hypothetical protein LOC283480                                          | 283480       | 5.79  | 0.006964 |
| zinc finger protein 179                                                 | 7732         | 5.73  | 0.032841 |

|                                                                                                                       |        |      |          |
|-----------------------------------------------------------------------------------------------------------------------|--------|------|----------|
| HRAS-like suppressor 3                                                                                                | 11145  | 5.65 | 0.009871 |
| sema domain, transmembrane domain (TM), and cytoplasmic domain<br>MRNA; cDNA DKFZp686M0856 (from clone DKFZp686M0856) | 10501  | 5.63 | 0.026898 |
| CDNA clone IMAGE:5286843                                                                                              |        | 5.62 | 0.00093  |
|                                                                                                                       |        | 5.6  | 0.021638 |
| Early B-cell factor                                                                                                   | 1879   | 5.55 | 0.006026 |
| integrin, beta-like 1 (with EGF-like repeat domains)                                                                  | 9358   | 5.51 | 0.000503 |
| Phosphorylase kinase, beta                                                                                            | 5257   | 5.47 | 0.014764 |
| C1q and tumor necrosis factor related protein 6                                                                       | 114904 | 5.37 | 0.011962 |
| mitochondrial ribosomal protein L41                                                                                   | 64975  | 5.36 | 0.002489 |
| fyn-related kinase                                                                                                    | 2444   | 5.31 | 0.000833 |
| lysocardiolipin acyltransferase                                                                                       | 253558 | 5.29 | 0.00124  |
| chromosome 1 open reading frame 54                                                                                    | 79630  | 5.28 | 0.007411 |
| phosphodiesterase 9A                                                                                                  | 5152   | 5.27 | 0.024804 |
| hypothetical protein DKFZp566N034                                                                                     | 81615  | 5.22 | 0.01086  |
| cytochrome P450, family 1, subfamily B, polypeptide 1                                                                 | 1545   | 5.17 | 0.021213 |
| hypothetical protein BC008326                                                                                         | 89944  | 5.16 | 0.045649 |
| MRNA; clone CD 43T7                                                                                                   |        | 5.15 | 0.026519 |
| Furry homolog (Drosophila)                                                                                            | 10129  | 5.13 | 0.021078 |
| AD031 protein                                                                                                         | 83935  | 5.1  | 0.008614 |
| zinc finger protein ZNF468                                                                                            | 90333  | 5.07 | 0.003962 |
| BIC transcript                                                                                                        | 114614 | 5.05 | 0.047049 |
| COMM domain containing 10                                                                                             | 51397  | 5.05 | 0.000132 |
| protein tyrosine phosphatase, receptor type, O /// protein tyrosine phosphatase                                       | 5800   | 5.03 | 0.045297 |
| ST8 alpha-N-acetyl-neuraminidase alpha-2,8-sialyltransferase 5                                                        | 29906  | 5.02 | 0.000852 |
| chaperonin containing TCP1, subunit 2 (beta)                                                                          | 10576  | 5.01 | 0.000005 |
| leucine rich repeat transmembrane neuronal 2                                                                          | 26045  | 4.94 | 0.024264 |
| lectin, galactoside-binding, soluble, 12 (galectin 12)                                                                | 85329  | 4.88 | 0.048344 |
| loss of heterozygosity, 11, chromosomal region 2, gene A                                                              | 4013   | 4.86 | 0.026138 |
| LOC440203                                                                                                             | 440203 | 4.85 | 0.009443 |
| seizure related 6 homolog (mouse)-like 2                                                                              | 26470  | 4.84 | 0.001598 |
| RAS p21 protein activator (GTPase activating protein) 1                                                               | 5921   | 4.82 | 0.048138 |
| thrombospondin 3                                                                                                      | 7059   | 4.81 | 0.014352 |
| mitogen-activated protein kinase kinase kinase kinase 4                                                               | 9448   | 4.77 | 0.017005 |
| testis specific, 14                                                                                                   | 95681  | 4.75 | 0.000653 |
| Notch homolog 3 (Drosophila)                                                                                          | 4854   | 4.74 | 0.027055 |
| decorin                                                                                                               | 1634   | 4.71 | 0.005605 |
| collagen, type III, alpha 1 (Ehlers-Danlos syndrome type IV, autosomal recessive)                                     | 1281   | 4.7  | 0.003446 |
| zinc finger-like                                                                                                      | 400713 | 4.7  | 0.000113 |
| cystatin C (amyloid angiopathy and cerebral hemorrhage)                                                               | 1471   | 4.66 | 0.006676 |
| LCHN protein                                                                                                          | 57189  | 4.65 | 0.032791 |
| homeo box A1                                                                                                          | 3198   | 4.62 | 0.003112 |
| F-box and leucine-rich repeat protein 8                                                                               | 55336  | 4.57 | 0.000263 |
| insulin-like growth factor binding protein 6                                                                          | 3489   | 4.53 | 0.02407  |
| gb:BE504098 /DB_XREF=gi:9706506 /DB_XREF=hv85b02.x1 /CLONE=IMAGE                                                      |        | 4.45 | 0.033715 |
| Full length insert cDNA clone YT94E02                                                                                 |        | 4.44 | 0.000197 |
| hypothetical protein DKFZp434H1419                                                                                    | 150967 | 4.43 | 0.022708 |
| neuronal pentraxin receptor                                                                                           | 23467  | 4.42 | 0.005321 |
| leukemia inhibitory factor receptor                                                                                   | 3977   | 4.41 | 0.007007 |
| beaded filament structural protein 1, filensin                                                                        | 631    | 4.4  | 0.000636 |
| Yip1 domain family, member 4                                                                                          | 84272  | 4.4  | 0.000026 |
| ST8 alpha-N-acetyl-neuraminidase alpha-2,8-sialyltransferase 4                                                        | 7903   | 4.39 | 0.007878 |

|                                                                               |        |       |          |
|-------------------------------------------------------------------------------|--------|-------|----------|
| spastic paraplegia 20, spartin (Troyer syndrome)                              | 23111  | 4.38  | 0.002015 |
| complement component 4A /// complement component 4B /// comple 432395 ///     |        | 4.37  | 0.003653 |
| mitogen-activated protein kinase kinase kinase kinase 4                       | 9448   | 4.34  | 0.009301 |
| component of oligomeric golgi complex 5                                       | 10466  | 4.32  | 0.0022   |
| Homo sapiens, clone IMAGE:5019307, mRNA                                       |        | 4.31  | 0.026081 |
| yippee-like 5 (Drosophila)                                                    | 51646  | 4.3   | 0.002719 |
| rhomboid, veinlet-like 7 (Drosophila)                                         | 57414  | 4.28  | 0.001546 |
| clusterin (complement lysis inhibitor, SP-40,40, sulfated glycoprotein        | 1191   | 4.27  | 0.018514 |
| hypothetical protein DKFZp434J1015                                            | 54753  | 4.26  | 0.002983 |
| propionyl Coenzyme A carboxylase, alpha polypeptide                           | 5095   | 4.25  | 0.004692 |
| glutaminase                                                                   | 2744   | 4.24  | 0.02668  |
| Transcribed locus, weakly similar to NP_055301.1 neuronal thread protein AD7c |        | 4.24  | 0.00449  |
| protective protein for beta-galactosidase (galactosialidosis)                 | 5476   | 4.23  | 0.007893 |
| CDNA FLJ30386 fis, clone BRACE2008216                                         |        | 4.21  | 0.001268 |
| ubiquitin-conjugating enzyme E2D 4 (putative)                                 | 51619  | 4.19  | 0.000128 |
| hypothetical protein LOC255458                                                | 255458 | 4.17  | 0.000271 |
| actin related protein 2/3 complex, subunit 1B, 41kDa                          | 10095  | 4.12  | 0.006649 |
| transmembrane protein induced by tumor necrosis factor alpha                  | 83862  | 4.11  | 0.009394 |
| chromosome 11 open reading frame 32                                           | 442871 | 4.09  | 0.004197 |
| churchill domain containing 1                                                 | 91612  | 4.09  | 0.00068  |
| protease, serine, 23                                                          | 11098  | 4.04  | 0.036825 |
| Splicing factor, arginine/serine-rich, 46kD                                   | 10929  | 4.04  | 0.005346 |
| poly(A) binding protein interacting protein 1                                 | 10605  | 4.03  | 0.016474 |
| ASAP                                                                          | 79884  | -4.05 | 0.000161 |
| serpin peptidase inhibitor, clade I (neuroserpin), member 1                   | 5274   | -4.09 | 0.024349 |
| apoptosis-inducing factor (AIF)-like mitochondrion-associated induce          | 84883  | -4.1  | 0.000484 |
| transducin-like enhancer of split 4 (E(sp1) homolog, Drosophila)              | 7091   | -4.13 | 0.005759 |
| optineurin                                                                    | 10133  | -4.15 | 0.000204 |
| hypothetical protein MGC3040                                                  | 66000  | -4.16 | 0.003905 |
| transporter 2, ATP-binding cassette, sub-family B (MDR/TAP)                   | 6891   | -4.17 | 0.002875 |
| trichorhinophalangeal syndrome I                                              | 7227   | -4.18 | 0.000382 |
| zinc finger protein 367                                                       | 195828 | -4.2  | 0.012899 |
| transcription factor Dp-1                                                     | 7027   | -4.21 | 0.001699 |
| mitochondrial ribosomal protein L43                                           | 84545  | -4.23 | 0.030031 |
| Kruppel-like factor 4 (gut)                                                   | 9314   | -4.24 | 0.000928 |
| amphiphysin (Stiff-Man syndrome with breast cancer 128kDa autoar              | 273    | -4.26 | 0.001762 |
| dihydropyrimidinase-like 5                                                    | 56896  | -4.27 | 0.0002   |
| RCC1 domain containing 1                                                      | 91433  | -4.27 | 0.004342 |
| fibulin 1                                                                     | 2192   | -4.29 | 0.000621 |
| UL16 binding protein 3                                                        | 79465  | -4.29 | 0.004541 |
| Transcribed locus                                                             |        | -4.29 | 0.019846 |
| Protein tyrosine phosphatase, receptor type, J                                | 5795   | -4.3  | 0.018624 |
| piggyBac transposable element derived 5                                       | 79605  | -4.31 | 0.000411 |
| beta 3-glycosyltransferase-like                                               | 145173 | -4.35 | 0.001172 |
| MAP/microtubule affinity-regulating kinase 1                                  | 4139   | -4.36 | 0.003702 |
| SRY (sex determining region Y)-box 5                                          | 6660   | -4.38 | 0.008835 |
| hypothetical protein FLJ20245                                                 | 54863  | -4.38 | 0.001726 |
| poly (ADP-ribose) polymerase family, member 9                                 | 83666  | -4.38 | 0.03286  |
| optineurin                                                                    | 10133  | -4.39 | 0.000226 |
| fibronectin type III domain containing 3B                                     | 64778  | -4.39 | 0.000094 |
| hypothetical protein FLJ25006                                                 | 124923 | -4.39 | 0.020184 |

|                                                                                                                                      |        |       |          |
|--------------------------------------------------------------------------------------------------------------------------------------|--------|-------|----------|
| outer dense fiber of sperm tails 2-like                                                                                              | 57489  | -4.41 | 0.000102 |
| zinc finger protein 85 (HPF4, HTF1)                                                                                                  | 7639   | -4.41 | 0.000406 |
| protein kinase, cAMP-dependent, catalytic, beta                                                                                      | 5567   | -4.42 | 0.006153 |
| zinc finger protein 542                                                                                                              | 147947 | -4.43 | 0.000444 |
| hypothetical gene supported by AK094796                                                                                              | 400764 | -4.47 | 0.014375 |
| proline-serine-threonine phosphatase interacting protein 2                                                                           | 9050   | -4.51 | 0.009868 |
| hypothetical gene supported by AL713796                                                                                              | 389831 | -4.52 | 0.000295 |
| hypothetical protein DKFZp762A217                                                                                                    | 160335 | -4.52 | 0.001819 |
| transcription factor Dp-1                                                                                                            | 7027   | -4.53 | 0.009887 |
| MRNA (clone ICRFp50711077)                                                                                                           |        | -4.53 | 0.008931 |
| transcription factor Dp-1                                                                                                            | 7027   | -4.53 | 0.00179  |
| gb:BE326808 /DB_XREF=gi:9200584 /DB_XREF=hr65b11.x1 /CLONE=IMAGE                                                                     |        | -4.55 | 0.004141 |
| melanoma antigen family C, 2                                                                                                         | 51438  | -4.56 | 0.000959 |
| tripartite motif-containing 34 /// tripartite motif-containing 6 and tripartite motif-containing 6 and tripartite motif-containing 6 |        | -4.58 | 0.002381 |
| ankyrin repeat domain 13C                                                                                                            | 81573  | -4.58 | 0.005915 |
| microfibrillar-associated protein 2                                                                                                  | 4237   | -4.59 | 0.015365 |
| Transcribed locus, moderately similar to XP_518244.1 PREDICTED: similar to s                                                         |        | -4.59 | 0.000508 |
| chromosome 21 open reading frame 7                                                                                                   | 56911  | -4.62 | 0.028157 |
| CDNA FLJ37216 fis, clone BRALZ2008696                                                                                                |        | -4.63 | 0.00302  |
| S100 calcium binding protein A2                                                                                                      | 6273   | -4.64 | 0.000033 |
| grancalcin, EF-hand calcium binding protein /// grancalcin, EF-hand calcium binding protein                                          | 25801  | -4.66 | 0.013046 |
| SMAD, mothers against DPP homolog 6 (Drosophila)                                                                                     | 4091   | -4.66 | 0.000331 |
| inhibitor of DNA binding 4, dominant negative helix-loop-helix protein                                                               | 3400   | -4.66 | 0.011998 |
| coagulation factor II (thrombin) receptor-like 2                                                                                     | 2151   | -4.67 | 0.031941 |
| mucolin 3                                                                                                                            | 55283  | -4.67 | 0.009635 |
| protein tyrosine phosphatase, non-receptor type 3                                                                                    | 5774   | -4.68 | 0.00302  |
| Tenascin C (hexabrachion)                                                                                                            | 3371   | -4.68 | 0.011998 |
| neuropilin 2                                                                                                                         | 8828   | -4.69 | 0.036984 |
| Full-length cDNA clone CS0DM012YE14 of Fetal liver of Homo sapiens                                                                   | 9760   | -4.69 | 0.027851 |
| synovial sarcoma, X breakpoint 2 interacting protein                                                                                 | 117178 | -4.7  | 0.00769  |
| melanoma antigen family E, 1                                                                                                         | 57692  | -4.75 | 0.000238 |
| UDP-Gal:betaGlcNAc beta 1,4- galactosyltransferase, polypeptide 6                                                                    | 9331   | -4.76 | 0.029466 |
| glutamate receptor, ionotropic, N-methyl-D-aspartate 3A                                                                              | 116443 | -4.76 | 0.044987 |
| hypothetical gene supported by AL713796                                                                                              | 389831 | -4.83 | 0.001176 |
| hypothetical protein                                                                                                                 | 387882 | -4.84 | 0.000679 |
| gb:A1523391 /DB_XREF=gi:4437526 /DB_XREF=ar72c09.x1 /CLONE=IMAGE::                                                                   |        | -4.84 | 0.001432 |
| melanoma antigen family C, 1                                                                                                         | 9947   | -4.86 | 0.002171 |
| CD99 antigen                                                                                                                         | 4267   | -4.86 | 0.002191 |
| aldo-keto reductase family 1, member C2 (dihydrodiol dehydrogenase)                                                                  | 1646   | -4.87 | 0.00543  |
| sarcoglycan, delta (35kDa dystrophin-associated glycoprotein)                                                                        | 6444   | -4.88 | 0.000376 |
| chromosome X open reading frame 33                                                                                                   | 139322 | -4.89 | 0.022506 |
| neurotrimin                                                                                                                          | 50863  | -4.92 | 0.000921 |
| fibroblast growth factor receptor 2 (bacteria-expressed kinase, keratin-associated protein 18)                                       | 2263   | -4.94 | 0.000268 |
| protocadherin 18                                                                                                                     | 54510  | -4.95 | 0.042764 |
| 2'-5'-oligoadenylate synthetase-like                                                                                                 | 8638   | -4.97 | 0.032546 |
| sphingomyelin phosphodiesterase, acid-like 3A                                                                                        | 10924  | -4.97 | 0.001339 |
| myosin, light polypeptide kinase                                                                                                     | 4638   | -4.98 | 0.014771 |
| cadherin 10, type 2 (T2-cadherin)                                                                                                    | 1008   | -4.99 | 0.009904 |
| glucosaminyl (N-acetyl) transferase 1, core 2 (beta-1,6-N-acetylglucosaminyl transferase 1, core 2)                                  | 2650   | -5    | 0.006004 |
| gb:U08626 /DB_XREF=gi:551473 /FEA=DNA /CNT=1 /TID=Hs.247984.0 /TIER                                                                  |        | -5.02 | 0.019615 |
| membrane protein, palmitoylated 6 (MAGUK p55 subfamily member)                                                                       | 51678  | -5.06 | 0.013894 |

|                                                                               |        |       |          |
|-------------------------------------------------------------------------------|--------|-------|----------|
| Coxsackie virus and adenovirus receptor                                       | 1525   | -5.08 | 0.001847 |
| ankyrin repeat and SOCS box-containing 9                                      | 140462 | -5.1  | 0.000138 |
| interferon regulatory factor 7                                                | 3665   | -5.13 | 0.012109 |
| Transmembrane and tetratricopeptide repeat containing 2                       | 160335 | -5.13 | 0.00069  |
| special AT-rich sequence binding protein 1 (binds to nuclear matrix/s         | 6304   | -5.14 | 0.001967 |
| brother of CDO                                                                | 91653  | -5.15 | 0.005454 |
| Transcription factor AP-2 alpha (activating enhancer binding protein          | 7020   | -5.16 | 0.008032 |
| hypothetical protein FLJ10094                                                 | 55068  | -5.17 | 0.002791 |
| FOS-like antigen 1                                                            | 8061   | -5.19 | 0.029302 |
| CDNA clone IMAGE:5312516                                                      |        | -5.19 | 0.001673 |
| choline phosphotransferase 1                                                  | 56994  | -5.19 | 0.000648 |
| CDNA FLJ37216 fis, clone BRALZ2008696                                         |        | -5.24 | 0.000669 |
| tropomyosin 2 (beta)                                                          | 7169   | -5.26 | 0.005132 |
| adrenergic, alpha-2A-, receptor /// adrenergic, alpha-2A-, receptor           | 150    | -5.27 | 0.001442 |
| hypothetical gene supported by AK123403                                       | 389834 | -5.27 | 0.009857 |
| glutamate-ammonia ligase (glutamine synthetase)                               | 2752   | -5.28 | 0.009253 |
| Hermansky-Pudlak syndrome 3                                                   | 84343  | -5.28 | 0.004688 |
| procollagen C-endopeptidase enhancer 2                                        | 26577  | -5.3  | 0.003392 |
| UDP-N-acetyl-alpha-D-galactosamine:polypeptide N-acetylgalactosæ              | 114805 | -5.3  | 0.011532 |
| tripartite motif-containing 14                                                | 9830   | -5.31 | 0.005441 |
| nuclear factor I/B                                                            | 4781   | -5.33 | 0.030481 |
| spondin 2, extracellular matrix protein                                       | 10417  | -5.33 | 0.001546 |
| gb:AV731490 /DB_XREF=gi:10840911 /DB_XREF=AV731490 /CLONE=HTFAz               |        | -5.34 | 0.0166   |
| neuroligin 1                                                                  | 22871  | -5.35 | 0.001527 |
| Transcribed locus, weakly similar to NP_060312.1 hypothetical protein FLJ2048 |        | -5.36 | 0.000398 |
| Transcribed locus                                                             |        | -5.37 | 0.005346 |
| cysteine and glycine-rich protein 1                                           | 1465   | -5.43 | 0.001087 |
| CDNA FLJ37216 fis, clone BRALZ2008696                                         |        | -5.43 | 0.000291 |
| nuclear factor (erythroid-derived 2)-like 3                                   | 9603   | -5.46 | 0.010469 |
| tumor suppressor candidate 1                                                  | 286319 | -5.5  | 0.00049  |
| XIAP associated factor-1                                                      | 54739  | -5.51 | 0.04476  |
| fatty acid binding protein 3, muscle and heart (mammary-derived grc           | 2170   | -5.53 | 0.034997 |
| rhomboid, veinlet-like 2 (Drosophila)                                         | 54933  | -5.53 | 0.000649 |
| TCDD-inducible poly(ADP-ribose) polymerase                                    | 25976  | -5.57 | 0.007835 |
| v-maf musculoaponeurotic fibrosarcoma oncogene homolog (avian)                | 4094   | -5.6  | 0.020022 |
| Transmembrane protein 56                                                      | 148534 | -5.6  | 0.001022 |
| protocadherin 9                                                               | 5101   | -5.62 | 0.013551 |
| Rho GTPase activating protein 28                                              | 79822  | -5.62 | 0.000078 |
| integrin, alpha 9                                                             | 3680   | -5.64 | 0.015404 |
| cartilage paired-class homeoprotein 1                                         | 8092   | -5.67 | 0.000797 |
| regeneration associated muscle protease                                       | 25891  | -5.67 | 0.029334 |
| solute carrier family 7 (cationic amino acid transporter, y+ system), n       | 6542   | -5.69 | 0.026401 |
| family with sequence similarity 26, member B                                  | 51063  | -5.7  | 0.000537 |
| phospholipase A2-activating protein                                           | 9373   | -5.71 | 0.000424 |
| cadherin 18, type 2                                                           | 1016   | -5.73 | 0.000537 |
| similar to hypothetical protein MGC27019                                      | 389833 | -5.76 | 0.000194 |
| nephroblastoma overexpressed gene                                             | 4856   | -5.79 | 0.014753 |
| chromosome 20 open reading frame 45                                           | 51012  | -5.79 | 0.005735 |
| Protein kinase, AMP-activated, alpha 2 catalytic subunit                      | 5563   | -5.79 | 0.020989 |
| aldolase C, fructose-bisphosphate                                             | 230    | -5.81 | 0.009451 |
| hypothetical protein FLJ10770                                                 | 55225  | -5.83 | 0.000312 |

|                                                                              |        |       |          |
|------------------------------------------------------------------------------|--------|-------|----------|
| CDNA clone IMAGE:6250506                                                     |        | -5.84 | 0.026572 |
| carbonic anhydrase XII                                                       | 771    | -5.85 | 0.00011  |
| ropporin, rhopilin associated protein 1B                                     | 152015 | -5.85 | 0.000953 |
| Hypothetical protein MGC21644                                                | 153768 | -5.85 | 0.000313 |
| melanoma antigen family A, 1 (directs expression of antigen MZ2-E)           | 4100   | -5.89 | 0.004944 |
| Transcribed locus                                                            |        | -5.89 | 0.001483 |
| chromosome 20 open reading frame 45                                          | 51012  | -5.9  | 0.021705 |
| angiopoietin-like 1                                                          | 9068   | -5.92 | 0.020411 |
| insulin-like growth factor binding protein 4                                 | 3487   | -5.93 | 0.000093 |
| cystathionase (cystathionine gamma-lyase)                                    | 1491   | -5.95 | 0.037043 |
| adenosine A2b receptor                                                       | 136    | -5.96 | 0.01343  |
| gephyrin                                                                     | 10243  | -6.01 | 0.002552 |
| insulin-like growth factor 1 receptor                                        | 3480   | -6.02 | 0.02217  |
| male sterility domain containing 1                                           | 55711  | -6.03 | 0.017222 |
| tripartite motif-containing 59                                               | 286827 | -6.04 | 0.005338 |
| vascular endothelial growth factor                                           | 7422   | -6.05 | 0.003337 |
| ankyrin repeat domain 45                                                     | 339416 | -6.05 | 0.00756  |
| Transcribed locus                                                            |        | -6.07 | 0.027685 |
| hexokinase 2                                                                 | 3099   | -6.11 | 0.008709 |
| hypothetical protein LOC129607                                               | 129607 | -6.12 | 0.011777 |
| hyaluronan-mediated motility receptor (RHAMM)                                | 3161   | -6.14 | 0.022321 |
| coiled-coil domain containing 2                                              | 80173  | -6.15 | 0.008351 |
| aquaporin 1 (channel-forming integral protein, 28kDa)                        | 358    | -6.16 | 0.046638 |
| gb:AF127481.1 /DB_XREF=gi:5199315 /GEN=proto-LBC /FEA=FLmRNA /CNT            |        | -6.16 | 0.013135 |
| LOC440669                                                                    | 440669 | -6.17 | 0.000248 |
| BTB (POZ) domain containing 11                                               | 121551 | -6.17 | 0.018879 |
| catalase                                                                     | 847    | -6.18 | 0.003688 |
| olfactomedin-like 3                                                          | 56944  | -6.2  | 0.012389 |
| chromosome 10 open reading frame 11                                          | 83938  | -6.22 | 0.001014 |
| Poly (ADP-ribose) polymerase family, member 8                                | 79668  | -6.22 | 0.000808 |
| chromosome 9 open reading frame 95                                           | 54981  | -6.24 | 0.000153 |
| Holocarboxylase synthetase (biotin-(propionyl-Coenzyme A-carboxyl            | 3141   | -6.26 | 0.024899 |
| interferon-induced protein with tetratricopeptide repeats 1 /// interfero    | 3434   | -6.28 | 0.01059  |
| DEAD (Asp-Glu-Ala-Asp) box polypeptide 58                                    | 23586  | -6.3  | 0.002979 |
| twist homolog 2 (Drosophila)                                                 | 117581 | -6.3  | 0.012437 |
| mucolin 2                                                                    | 255231 | -6.32 | 0.008669 |
| catalase /// catalase                                                        | 847    | -6.34 | 0.004849 |
| cullin-associated and neddylation-dissociated 2 (putative)                   | 23066  | -6.34 | 0.000251 |
| hypothetical protein FLJ10178                                                | 55086  | -6.34 | 0.001198 |
| neuro-oncological ventral antigen 1                                          | 4857   | -6.36 | 0.034779 |
| pentraxin-related gene, rapidly induced by IL-1 beta                         | 5806   | -6.43 | 0.014418 |
| likely ortholog of mouse schlafen 8/9                                        | 91607  | -6.44 | 0.000823 |
| Transcribed locus, strongly similar to NP_002137.3 homeo box B3; homeo box : |        | -6.45 | 0.001231 |
| collagen, type XXI, alpha 1 /// collagen, type XXI, alpha 1                  | 81578  | -6.46 | 0.013912 |
| similar to Histone H3.3                                                      | 392533 | -6.48 | 0.003318 |
| tripartite motif-containing 14                                               | 9830   | -6.49 | 0.00436  |
| Paired box gene 8                                                            | 7849   | -6.5  | 0.002629 |
| paired box gene 3 (Waardenburg syndrome 1)                                   | 5077   | -6.52 | 0.000652 |
| chromosome 10 open reading frame 48                                          | 283078 | -6.52 | 0.003405 |
| phosphodiesterase 1C, calmodulin-dependent 70kDa                             | 5137   | -6.54 | 0.023316 |
| chromosome 21 open reading frame 91                                          | 54149  | -6.59 | 0.000334 |

|                                                                        |             |       |          |
|------------------------------------------------------------------------|-------------|-------|----------|
| absent in melanoma 1                                                   | 202         | -6.6  | 0.003686 |
| trichorhinophalangeal syndrome I                                       | 7227        | -6.61 | 0.038526 |
| roundabout, axon guidance receptor, homolog 2 (Drosophila)             | 6092        | -6.61 | 0.03421  |
| v-ets erythroblastosis virus E26 oncogene homolog 2 (avian)            | 2114        | -6.62 | 0.02335  |
| tubulin tyrosine ligase-like family, member 7                          | 79739       | -6.62 | 0.005829 |
| Chromosome 9 open reading frame 3                                      | 84909       | -6.63 | 0.002053 |
| testis expressed sequence 15                                           | 56154       | -6.63 | 0.008609 |
| follistatin                                                            | 10468       | -6.64 | 0.029848 |
| hypothetical protein FLJ30046                                          | 122060      | -6.67 | 0.025733 |
| arylsulfatase J                                                        | 79642       | -6.69 | 0.038715 |
| Chromosome 20 open reading frame 45                                    | 51012       | -6.69 | 0.041078 |
| cyclin-dependent kinase inhibitor 2B (p15, inhibits CDK4)              | 1030        | -6.7  | 0.00648  |
| tetraspanin 15                                                         | 23555       | -6.75 | 0.031275 |
| matrix-remodelling associated 5                                        | 25878       | -6.76 | 0.000305 |
| similar to Polyadenylate-binding protein 4 (Poly(A)-binding protein 4) | 132430      | -6.83 | 0.033473 |
| protocadherin beta 3                                                   | 56132       | -6.83 | 0.025458 |
| dimethylarginine dimethylaminohydrolase 1                              | 23576       | -6.85 | 0.018508 |
| interleukin 11 receptor, alpha                                         | 3590        | -6.87 | 0.007056 |
| Fraser syndrome 1                                                      | 80144       | -6.92 | 0.036913 |
| tight junction protein 2 (zona occludens 2)                            | 9414        | -6.94 | 0.002043 |
| protocadherin beta 2                                                   | 56133       | -6.95 | 0.019903 |
| ropporin, rhopilin associated protein 1                                | 54763       | -6.97 | 0.000084 |
| sclerostin domain containing 1                                         | 25928       | -6.99 | 0.003942 |
| Connector enhancer of kinase suppressor of Ras 2                       | 22866       | -7    | 0.005218 |
| CDNA FLJ30740 fis, clone FEBRA2000319                                  |             | -7.05 | 0.000452 |
| 2'-5'-oligoadenylate synthetase 3, 100kDa                              | 4940        | -7.08 | 0.015163 |
| six transmembrane epithelial antigen of the prostate 1                 | 26872       | -7.12 | 0.019233 |
| pleckstrin homology domain containing, family A member 5               | 54477       | -7.17 | 0.004999 |
| growth factor receptor-bound protein 10                                | 2887        | -7.18 | 0.005262 |
| ring finger protein 182                                                | 221687      | -7.2  | 0.028713 |
| growth arrest-specific 1                                               | 2619        | -7.22 | 0.011178 |
| 28kD interferon responsive protein                                     | 64108       | -7.22 | 0.018689 |
| Phosphodiesterase 3B, cGMP-inhibited                                   | 5140        | -7.23 | 0.018651 |
| Proline rich Gla (G-carboxyglutamic acid) 4 (transmembrane)            | 79056       | -7.23 | 0.007804 |
| fasciculation and elongation protein zeta 1 (zygin I)                  | 9638        | -7.27 | 0.002646 |
| Transcribed locus                                                      |             | -7.29 | 0.018169 |
| mesenchyme homeo box 2 (growth arrest-specific homeo box)              | 4223        | -7.32 | 0.005313 |
| hypothetical LOC402110                                                 | 402110      | -7.32 | 0.015994 |
| desmoglein 2                                                           | 1829        | -7.37 | 0.005834 |
| Male sterility domain containing 1                                     | 55711       | -7.47 | 0.009703 |
| gb:AI341053 /DB_XREF=gi:4077980 /DB_XREF=qx89a08.x1 /CLONE=IMAGE:      |             | -7.5  | 0.00246  |
| Hypothetical protein MGC39606                                          | 399668      | -7.5  | 0.000374 |
| midline 1 (Opitz/BBB syndrome)                                         | 4281        | -7.52 | 0.012081 |
| G protein-coupled receptor 37 (endothelin receptor type B-like)        | 2861        | -7.53 | 0.0024   |
| transforming growth factor, beta 2                                     | 7042        | -7.55 | 0.001843 |
| Choroideremia (Rab escort protein 1)                                   | 1121        | -7.55 | 0.025805 |
| PTPRF interacting protein, binding protein 2 (liprin beta 2)           | 8495        | -7.56 | 0.000473 |
| laminin, alpha 1                                                       | 284217      | -7.59 | 0.021162 |
| adenylate kinase 3-like 1 /// adenylate kinase 3-like 2                | 205 /// 387 | -7.61 | 0.000446 |
| interleukin 15                                                         | 3600        | -7.62 | 0.000485 |
| leucine rich repeat containing 44                                      | 127255      | -7.63 | 0.00997  |

|                                                                         |        |       |          |
|-------------------------------------------------------------------------|--------|-------|----------|
| solute carrier family 16 (monocarboxylic acid transporters), member     | 9123   | -7.69 | 0.02147  |
| v-kit Hardy-Zuckerman 4 feline sarcoma viral oncogene homolog           | 3815   | -7.74 | 0.042668 |
| chromosome 9 open reading frame 3                                       | 84909  | -7.74 | 0.009463 |
| solute carrier family 38, member 4                                      | 55089  | -7.76 | 0.001194 |
| placenta-specific 9                                                     | 219348 | -7.8  | 0.019791 |
| insulin-like growth factor binding protein 3                            | 3486   | -7.81 | 0.001375 |
| CDNA clone IMAGE:5294528                                                |        | -7.81 | 0.001466 |
| absent in melanoma 2                                                    | 9447   | -7.9  | 0.041098 |
| protein kinase, cGMP-dependent, type I                                  | 5592   | -7.93 | 0.020644 |
| ST6 beta-galactosamide alpha-2,6-sialyltransferase 2                    | 84620  | -7.99 | 0.046817 |
| KIAA1679 protein                                                        | 80731  | -8.02 | 0.004678 |
| sorbin and SH3 domain containing 1                                      | 10580  | -8.1  | 0.004775 |
| enoyl-Coenzyme A, hydratase/3-hydroxyacyl Coenzyme A dehydrog           | 1962   | -8.11 | 0.00692  |
| Aldolase A, fructose-bisphosphate pseudogene 2                          | 387718 | -8.12 | 0.035325 |
| L1 cell adhesion molecule                                               | 3897   | -8.16 | 0.010297 |
| chromosome 6 open reading frame 32                                      | 9750   | -8.18 | 0.0076   |
| pleckstrin homology-like domain, family B, member 2                     | 90102  | -8.2  | 0.009582 |
| guanylate binding protein 2, interferon-inducible                       | 2634   | -8.2  | 0.018273 |
| ropporin, rhopilin associated protein 1                                 | 54763  | -8.23 | 0.000798 |
| protocadherin 20                                                        | 64881  | -8.26 | 0.007614 |
| stimulated by retinoic acid gene 6 homolog (mouse) /// stimulated by    | 64220  | -8.31 | 0.000369 |
| brain expressed X-linked-like 1                                         | 56271  | -8.34 | 0.001202 |
| inter-alpha (globulin) inhibitor H4 (plasma Kallikrein-sensitive glycop | 3700   | -8.41 | 0.001173 |
| Collagen, type VIII, alpha 1                                            | 1295   | -8.45 | 0.037481 |
| trinucleotide repeat containing 9                                       | 27324  | -8.48 | 0.007399 |
| interferon, alpha-inducible protein (clone IFI-15K)                     | 9636   | -8.5  | 0.000549 |
| cytochrome P450, family 2, subfamily J, polypeptide 2                   | 1573   | -8.57 | 0.00698  |
| Similar to hypothetical protein MGC27019                                | 389833 | -8.57 | 0.029123 |
| toll-like receptor 3                                                    | 7098   | -8.59 | 0.017449 |
| chromosome 2 open reading frame 32                                      | 25927  | -8.59 | 0.000027 |
| potassium channel, subfamily K, member 1                                | 3775   | -8.64 | 0.000516 |
| hypothetical protein LOC283824                                          | 283824 | -8.64 | 0.038063 |
| Hypothetical LOC401384                                                  | 402560 | -8.65 | 0.000084 |
| PDZ and LIM domain 4                                                    | 8572   | -8.68 | 0.000447 |
| mucolipin 2                                                             | 255231 | -8.73 | 0.000341 |
| monoglyceride lipase /// monoglyceride lipase                           | 11343  | -8.77 | 0.009086 |
| T-box 3 (ulnar mammary syndrome)                                        | 6926   | -8.77 | 0.000373 |
| fibroblast growth factor 2 (basic)                                      | 2247   | -8.84 | 0.044607 |
| CDNA clone IMAGE:4820330                                                |        | -8.85 | 0.001555 |
| cadherin 13, H-cadherin (heart)                                         | 1012   | -8.95 | 0.023185 |
| chromosome 1 open reading frame 24                                      | 116496 | -8.99 | 0.023971 |
| chromosome 9 open reading frame 64                                      | 84267  | -9    | 0.026548 |
| CDNA clone IMAGE:30343207                                               |        | -9.06 | 0.004147 |
| protein phosphatase 1K (PP2C domain containing)                         | 152926 | -9.12 | 0.0341   |
| dynamitin 3                                                             | 26052  | -9.17 | 0.000194 |
| hypothetical gene supported by BC013438                                 | 375295 | -9.18 | 0.047115 |
| RAS-like, family 12                                                     | 51285  | -9.19 | 0.010782 |
| phospholipase C, epsilon 1                                              | 51196  | -9.24 | 0.016274 |
| trichorhinophalangeal syndrome I                                        | 7227   | -9.33 | 0.024097 |
| cathepsin Z                                                             | 1522   | -9.37 | 0.039734 |
| tensin 1 /// tensin 1                                                   | 7145   | -9.37 | 0.023617 |



|                                                                           |        |        |          |
|---------------------------------------------------------------------------|--------|--------|----------|
| interferon induced with helicase C domain 1                               | 64135  | -9.38  | 0.033841 |
| potassium inwardly-rectifying channel, subfamily J, member 15             | 3772   | -9.4   | 0.007763 |
| P antigen family, member 5 (prostate associated)                          | 90737  | -9.43  | 0.021324 |
| PDZ and LIM domain 4                                                      | 8572   | -9.5   | 0.004656 |
| four and a half LIM domains 2                                             | 2274   | -9.52  | 0.035661 |
| ADAM metallopeptidase with thrombospondin type 1 motif, 3                 | 9508   | -9.57  | 0.045149 |
| neuromedin U                                                              | 10874  | -9.62  | 0.024909 |
| proteoglycan 1, secretory granule                                         | 5552   | -9.65  | 0.02353  |
| Transcribed locus                                                         |        | -9.75  | 0.001306 |
| ST8 alpha-N-acetyl-neuraminide alpha-2,8-sialyltransferase 2              | 8128   | -9.8   | 0.003939 |
| adenylate kinase 3-like 1                                                 | 205    | -9.84  | 0.001034 |
| RAB3B, member RAS oncogene family                                         | 5865   | -9.85  | 0.042702 |
| ELAV (embryonic lethal, abnormal vision, Drosophila)-like 2 (Hu anti      | 1993   | -9.86  | 0.04847  |
| coagulation factor II (thrombin) receptor-like 2                          | 2151   | -9.86  | 0.003601 |
| KIAA0527 protein                                                          | 26032  | -9.98  | 0.010459 |
| RNA binding motif protein 24                                              | 221662 | -10.09 | 0.007072 |
| plastin 1 (I isoform)                                                     | 5357   | -10.17 | 0.033822 |
| Glypican 6                                                                | 10082  | -10.25 | 0.000257 |
| neuronal cell adhesion molecule                                           | 4897   | -10.29 | 0.034467 |
| carboxypeptidase X (M14 family), member 2                                 | 119587 | -10.31 | 0.028909 |
| Lysyl oxidase-like 1                                                      | 4016   | -10.39 | 0.010837 |
| chromosome 6 open reading frame 32                                        | 9750   | -10.42 | 0.00089  |
| stanniocalcin 1                                                           | 6781   | -10.44 | 0.015384 |
| cache domain containing 1                                                 | 57685  | -10.44 | 0.001244 |
| ecotropic viral integration site 1                                        | 2122   | -10.44 | 0.005983 |
| 2',5'-oligoadenylate synthetase 1, 40/46kDa                               | 4938   | -10.46 | 0.006627 |
| cytochrome b-561                                                          | 1534   | -10.57 | 0.000152 |
| unc-13 homolog B (C. elegans)                                             | 10497  | -10.58 | 0.021855 |
| runt-related transcription factor 1; translocated to, 1 (cyclin D-related | 862    | -10.7  | 0.039623 |
| collagen, type XXV, alpha 1                                               | 84570  | -10.75 | 0.049495 |
| mab-21-like 2 (C. elegans)                                                | 10586  | -10.88 | 0.003764 |
| gb:AI480314 /DB_XREF=gi:4373482 /DB_XREF=tm26h05.x1 /CLONE=IMAGE          |        | -11    | 0.025602 |
| LOC440669                                                                 | 440669 | -11.14 | 0.000309 |
| phospholipid scramblase 1                                                 | 5359   | -11.15 | 0.00637  |
| protein tyrosine phosphatase, non-receptor type 20                        | 26095  | -11.23 | 0.020615 |
| RAR-related orphan receptor A                                             | 6095   | -11.26 | 0.025275 |
| dipeptidylpeptidase 6                                                     | 1804   | -11.41 | 0.048752 |
| interferon, alpha-inducible protein (clone IFI-6-16)                      | 2537   | -11.53 | 0.002756 |
| Transcribed locus                                                         |        | -11.56 | 0.001388 |
| hypothetical protein DKFZp313A2432                                        | 258010 | -11.63 | 0.002348 |
| thymus high mobility group box protein TOX                                | 9760   | -11.64 | 0.038529 |
| SRY (sex determining region Y)-box 11                                     | 6664   | -11.85 | 0.048079 |
| cytochrome P450, family 39, subfamily A, polypeptide 1                    | 51302  | -11.92 | 0.008453 |
| E2a-Pbx1-associated protein                                               | 56899  | -12    | 0.007279 |
| diaphanous homolog 2 (Drosophila)                                         | 1730   | -12.02 | 0.025399 |
| Unc-5 homolog D (C. elegans)                                              | 137970 | -12.09 | 0.03656  |
| KIAA1729 protein                                                          | 85460  | -12.15 | 0.000356 |
| growth factor receptor-bound protein 10                                   | 2887   | -12.37 | 0.008833 |
| SRY (sex determining region Y)-box 2                                      | 6657   | -12.45 | 0.00059  |
| Rho GTPase activating protein 28                                          | 79822  | -12.46 | 0.001032 |
| junctionophilin 1                                                         | 56704  | -12.48 | 0.035475 |

|                                                                        |        |        |          |
|------------------------------------------------------------------------|--------|--------|----------|
| cyclin D1                                                              | 595    | -12.49 | 0.029428 |
| thioredoxin interacting protein                                        | 10628  | -12.67 | 0.022254 |
| Malic enzyme 1, NADP(+)-dependent, cytosolic                           | 4199   | -12.68 | 0.000039 |
| RAR-related orphan receptor A                                          | 6095   | -12.79 | 0.023342 |
| WD repeat domain 72                                                    | 256764 | -12.9  | 0.002879 |
| epithelial stromal interaction 1 (breast)                              | 94240  | -12.93 | 0.0006   |
| solute carrier family 16 (monocarboxylic acid transporters), member    | 9194   | -13.02 | 0.00297  |
| Proprotein convertase subtilisin/kexin type 5                          | 5125   | -13.05 | 0.002744 |
| transcription factor AP-2 gamma (activating enhancer binding protein   | 7022   | -13.09 | 0.041195 |
| hypothetical LOC554202                                                 | 554202 | -13.12 | 0.00007  |
| microsomal glutathione S-transferase 1                                 | 4257   | -13.21 | 0.011527 |
| monoamine oxidase A                                                    | 4128   | -13.23 | 0.031279 |
| collagen, type XIII, alpha 1                                           | 1305   | -13.23 | 0.045344 |
| R-spondin 2 homolog ( <i>Xenopus laevis</i> )                          | 340419 | -13.23 | 0.012198 |
| cellular retinoic acid binding protein 2                               | 1382   | -13.32 | 0.000075 |
| hect domain and RLD 6                                                  | 55008  | -13.38 | 0.019233 |
| gb:AU151107 /DB_XREF=gi:11012628 /DB_XREF=AU151107 /CLONE=NT2RI        |        | -13.39 | 0.023717 |
| Leucine rich repeat neuronal 6C                                        | 158038 | -13.54 | 0.040253 |
| phosphodiesterase 3B, cGMP-inhibited                                   | 5140   | -13.78 | 0.018593 |
| tensin 1 /// tensin 1                                                  | 7145   | -13.86 | 0.032193 |
| Transcribed locus                                                      |        | -13.87 | 0.019613 |
| transcription factor AP-2 alpha (activating enhancer binding protein 2 | 7020   | -13.88 | 0.011034 |
| secreted and transmembrane 1                                           | 6398   | -13.96 | 0.007154 |
| C-type lectin domain family 2, member B                                | 9976   | -14.45 | 0.017595 |
| myxovirus (influenza virus) resistance 2 (mouse)                       | 4600   | -14.46 | 0.011019 |
| gastrin-releasing peptide                                              | 2922   | -14.7  | 0.035202 |
| synaptotagmin I                                                        | 6857   | -14.81 | 0.002493 |
| collagen, type IX, alpha 3                                             | 1299   | -14.96 | 0.023833 |
| PDZ and LIM domain 4                                                   | 8572   | -15.08 | 0.006476 |
| synapse defective 1, Rho GTPase, homolog 2 ( <i>C. elegans</i> )       | 84144  | -15.11 | 0.005939 |
| glutathione peroxidase 7                                               | 2882   | -15.21 | 0.010613 |
| ephrin-B2                                                              | 1948   | -15.35 | 0.00757  |
| Chimerin (chimaerin) 2                                                 | 1124   | -15.38 | 0.019592 |
| paired-like homeodomain transcription factor 2                         | 5308   | -15.42 | 0.031805 |
| integrin, alpha 6                                                      | 3655   | -15.57 | 0.000006 |
| endomucin                                                              | 51705  | -15.88 | 0.000164 |
| hydroxyprostaglandin dehydrogenase 15-(NAD)                            | 3248   | -16.07 | 0.005778 |
| interferon-induced protein 44-like                                     | 10964  | -16.11 | 0.033083 |
| CDNA clone IMAGE:5288238 /// CDNA FLJ43039 fis, clone BRTHA3003023     |        | -16.17 | 0.041388 |
| Hypothetical protein LOC285513                                         | 285513 | -16.53 | 0.022928 |
| hypothetical protein FLJ37659                                          | 286499 | -16.75 | 0.025158 |
| fibronectin leucine rich transmembrane protein 3                       | 23767  | -16.82 | 0.009865 |
| guanylate binding protein 1, interferon-inducible, 67kDa               | 2633   | -17.26 | 0.013088 |
| Ca <sup>2+</sup> -dependent activator protein for secretion 2          | 93664  | -17.45 | 0.024912 |
| CDNA clone IMAGE:6186815                                               |        | -17.85 | 0.001101 |
| ST6 (alpha-N-acetyl-neuraminyl-2,3-beta-galactosyl-1,3)-N-acetylgl     | 81849  | -17.86 | 0.009698 |
| hephaestin                                                             | 9843   | -17.87 | 0.000348 |
| cytochrome P450, family 26, subfamily B, polypeptide 1                 | 56603  | -18.01 | 0.003805 |
| Two transmembrane A                                                    | 388459 | -18.17 | 0.000245 |
| CDNA FLJ39164 fis, clone OCBBF2002656                                  |        | -18.18 | 0.037639 |
| Desmoglein 2                                                           | 1829   | -18.21 | 0.012145 |



|                                                                        |            |        |          |
|------------------------------------------------------------------------|------------|--------|----------|
| ring finger protein 150                                                | 57484      | -27.67 | 0.000041 |
| hypothetical protein LOC283666                                         | 283666     | -27.81 | 0.016109 |
| met proto-oncogene (hepatocyte growth factor receptor)                 | 4233       | -27.86 | 0.001626 |
| KIAA1797                                                               | 54914      | -27.91 | 0.006845 |
| phospholipase C, beta 1 (phosphoinositide-specific)                    | 23236      | -29    | 0.00505  |
| DKFZP434B061 protein                                                   | 26080      | -29.96 | 0.02162  |
| kelch-like 14 (Drosophila)                                             | 57565      | -29.99 | 0.034487 |
| potassium voltage-gated channel, Isk-related family, member 4          | 23704      | -30.16 | 0.016798 |
| Synapse defective 1, Rho GTPase, homolog 2 (C. elegans)                | 84144      | -30.29 | 0.01481  |
| PDZ domain containing RING finger 3                                    | 23024      | -30.58 | 0.011072 |
| EPH receptor A3                                                        | 2042       | -30.76 | 0.040292 |
| collagen, type VIII, alpha 2                                           | 1296       | -31.31 | 0.010093 |
| CDNA FLJ39164 fis, clone OCBBF2002656                                  |            | -31.78 | 0.028527 |
| glutaminyl-peptide cyclotransferase (glutaminyl cyclase)               | 25797      | -32.83 | 0.01599  |
| X (inactive)-specific transcript                                       | 7503       | -32.85 | 0.010491 |
| growth arrest-specific 2                                               | 2620       | -33.39 | 0.001093 |
| protein tyrosine phosphatase, receptor type, M                         | 5797       | -33.56 | 0.006529 |
| fibronectin leucine rich transmembrane protein 3                       | 23767      | -34.1  | 0.025056 |
| interferon-induced protein 44                                          | 10561      | -34.53 | 0.013864 |
| X (inactive)-specific transcript                                       | 7503       | -34.65 | 0.01147  |
| hypothetical protein MGC33365                                          | 205428     | -35.37 | 0.031311 |
| CUG triplet repeat, RNA binding protein 2                              | 10659      | -35.92 | 0.035013 |
| Adrenergic, alpha-1A-, receptor                                        | 148        | -36.09 | 0.024325 |
| transcription elongation factor A (SII)-like 7                         | 56849      | -36.84 | 0.008165 |
| myxovirus (influenza virus) resistance 1, interferon-inducible protein | 4599       | -36.91 | 0.011645 |
| kelch-like 9 (Drosophila)                                              | 55958      | -36.92 | 0.001018 |
| chemokine (C-X-C motif) ligand 14                                      | 9547       | -37.17 | 0.041468 |
| Potassium voltage-gated channel, Isk-related family, member 4          | 23704      | -37.27 | 0.003881 |
| fatty acid binding protein 5 (psoriasis-associated)                    | 2171       | -38.7  | 0.002601 |
| protein tyrosine phosphatase, receptor type, M                         | 5797       | -38.9  | 0.009965 |
| X (inactive)-specific transcript                                       | 7503       | -39.19 | 0.014671 |
| endomucin                                                              | 51705      | -39.9  | 0.000809 |
| Mst3 and SOK1-related kinase                                           | 51765      | -41.23 | 0.007628 |
| ST6 (alpha-N-acetyl-neuraminyl-2,3-beta-galactosyl-1,3)-N-acetylgl     | 81849      | -41.34 | 0.006659 |
| inhibitor of DNA binding 3, dominant negative helix-loop-helix proteir | 3399       | -42.41 | 0.001231 |
| visinin-like 1                                                         | 7447       | -42.54 | 0.011797 |
| nuclear factor I/A                                                     | 4774       | -42.93 | 0.015824 |
| glypican 3                                                             | 2719       | -43.03 | 0.028887 |
| melanoma antigen family A, 2 /// melanoma antigen family A, 2B         | 266740 /// | -45.86 | 0.026463 |
| leucine-rich repeats and calponin homology (CH) domain containing      | 57631      | -51.32 | 0.003553 |
| inhibitor of DNA binding 4, dominant negative helix-loop-helix proteir | 3400       | -53.06 | 0.027083 |
| fibronectin leucine rich transmembrane protein 2                       | 23768      | -53.51 | 0.003567 |
| lipase, endothelial                                                    | 9388       | -56.15 | 0.030105 |
| protein kinase (cAMP-dependent, catalytic) inhibitor beta              | 5570       | -58.91 | 0.027824 |
| inhibitor of DNA binding 1, dominant negative helix-loop-helix proteir | 3397       | -59.19 | 0.005202 |
| integral membrane protein 2A                                           | 9452       | -60.82 | 0.041634 |
| visinin-like 1                                                         | 7447       | -63.48 | 0.010113 |
| interferon, alpha-inducible protein 27                                 | 3429       | -66.52 | 0.01151  |
| fatty acid binding protein 7, brain                                    | 2173       | -77.17 | 0.008192 |
| CD24 antigen (small cell lung carcinoma cluster 4 antigen)             | 934        | -85.26 | 0.008739 |
| similar to RIKEN cDNA 1200014N16 gene                                  | 92092      | -86.48 | 0.007004 |

|                                                                    |       |         |          |
|--------------------------------------------------------------------|-------|---------|----------|
| cyclin-dependent kinase inhibitor 2A (melanoma, p16, inhibits CDK4 | 1029  | -101.02 | 0.007481 |
| secreted frizzled-related protein 2                                | 6423  | -105.14 | 0.013556 |
| Down syndrome critical region gene 8                               | 84677 | -127.58 | 0.000638 |
| cysteine-rich secretory protein LCCL domain containing 1           | 83690 | -147.67 | 0.001707 |
| ZW10 interactor                                                    | 11130 | -156.67 | 0.002363 |
| transmembrane protein 47                                           | 83604 | -233.79 | 0.001764 |

## Supplementary Table 7

Supplementary Table 7. p values of shared genes overexpressed in CD133+ D431 and CD133+ S496 GBM cells shown in Table 1\*

| Gene                                                          | Symbol  | Gene I.D. | Chromosome    | Fold change |          | P value |          |
|---------------------------------------------------------------|---------|-----------|---------------|-------------|----------|---------|----------|
|                                                               |         |           |               | D431        | S496     | D431    | S496     |
| sema, transmembrane, and cytoplasmic domain, 6D               | SEMA6D  | 80031     | 15q21         | 117.89      | 0.004256 | 4.16    | 0.004085 |
| growth associated protein 43                                  | GAP43   | 2596      | 3q13.1-q13.2  | 110.32      | 0.003414 | 25.56   | 0.008886 |
| distal-less homeo box 6                                       | DLX6    | 1750      | 7q22          | 78.94       | 0.000513 | 40.90   | 0.023314 |
| BH-protocadherin (brain-heart)                                | PCDH7   | 5099      | 4p15          | 62.58       | 0.003992 | 3.76    | 0.00506  |
| prominin 1/CD133                                              | PROM1   | 8842      | 4p15.32       | 52.87       | 0.010701 | 13.70   | 0.040133 |
| endothelin 3                                                  | EDN3    | 1908      | 20q13.2-q13.3 | 43.96       | 0.01585  | 26.35   | 0.00035  |
| ST8 alpha-N-acetyl-neuraminide alpha-2,8-sialyltransferase 4  | ST8SIA4 | 7903      | 5q21          | 43.56       | 0.006025 | 5.39    | 0.001432 |
| transcription factor AP-2 beta                                | TFAP2B  | 7021      | 6p12          | 37.28       | 0.016388 | 22.01   | 0.045574 |
| distal-less homeo box 5                                       | DLX5    | 1749      | 7q22          | 36.64       | 0.004973 | 17.18   | 0.004164 |
| neurexin 3                                                    | NRXN3   | 9369      | 14q31         | 27.84       | 0.003597 | 5.79    | 0.000087 |
| cholinergic receptor, nicotinic, alpha polypeptide 9          | CHRNA9  | 55584     | 4p14          | 27.24       | 0.005201 | 3.99    | 0.023476 |
| fatty acid binding protein 4, adipocyte                       | FABP4   | 2167      | 8q21          | 26.43       | 0.008978 | 70.07   | 0.001769 |
| peptidase inhibitor 15                                        | PI15    | 51050     | 8q21.11       | 24.09       | 0.002221 | 7.79    | 0.033561 |
| cholinergic receptor, nicotinic, alpha polypeptide 1 (muscle) | CHRNA1  | 1134      | 2q24-q32      | 23.12       | 0.000005 | 6.33    | 0.005373 |
| glycoprotein M6B                                              | GPM6B   | 2824      | Xp22.2        | 23.12       | 0.001827 | 5.79    | 0.001799 |
| sortilin-related VPS10 domain containing receptor 1           | SORCS1  | 114815    | 10q23-q25     | 19.39       | 0.02014  | 45.42   | 0.011354 |
| protein phosphatase, EF-hand calcium binding domain 1         | PPEF1   | 5475      | Xp22.2-p22.1  | 19.18       | 0.014379 | 9.59    | 0.034167 |
| kinesin family member 5C                                      | KIF5C   | 3800      | 2q23.1        | 19.03       | 0.003683 | 17.36   | 0.002331 |
| Down syndrome critical region gene 1-like 1                   | RCAN2   | 10231     | 6p12.3        | 18.71       | 0.011425 | 10.06   | 0.033844 |
| leucine-rich repeat-containing G protein-coupled receptor 5   | LGR5    | 8549      | 12q22-q23     | 18.56       | 0.012666 | 4.59    | 0.020432 |
| glutamate receptor, ionotropic, AMPA 1                        | GRIA1   | 2890      | 5q31.1        | 16.48       | 0.013535 | 14.20   | 0.017366 |
| mesenchyme homeo box 2                                        | MEOX2   | 4223      | 7p22.1-p21.3  | 15.64       | 0.014484 | 47.53   | 0.006567 |
| monooxygenase, DBH-like 1                                     | MOXD1   | 26002     | 6q23.1-q23.3  | 15.53       | 0.006919 | 23.19   | 0.000125 |
| cholinergic receptor, muscarinic 3                            | CHRM3   | 1131      | 1q43          | 14.44       | 0.01216  | 7.26    | 0.004492 |
| sulfatase 1                                                   | SULF1   | 23213     | 8q13.2-q13.3  | 13.96       | 0.007959 | 30.43   | 0.001326 |
| regulator of G-protein signalling 5                           | RGS5    | 8490      | 1q23.1        | 13.19       | 0.015608 | 15.10   | 0.000153 |
| frizzled-related protein                                      | FRZB    | 2487      | 2qter         | 12.98       | 0.013552 | 6.01    | 0.01531  |
| neurocalcin delta                                             | NCALD   | 83988     | 8q22.2        | 11.78       | 0.006287 | 3.54    | 0.01064  |
| gamma-aminobutyric acid (GABA) receptor, rho 1                | GABRR1  | 2569      | 6p13-q16.3    | 11.35       | 0.000006 | 5.08    | 0.001133 |
| protocadherin 19                                              | PCDH19  | 57526     | Xq13.3        | 11.04       | 0.000595 | 5.16    | 0.029916 |
| SRY (sex determining region Y)-box 2                          | SOX2    | 6657      | 3q26.3-q27    | 10.74       | 0.014059 | 7.49    | 0.000005 |
| TRAF2 and NCK interacting kinase                              | TNIK    | 23043     | 3q26.2-q26.31 | 9.72        | 0.006537 | 3.41    | 0.017156 |
| mesoderm specific transcript homolog (mouse)                  | MEST    | 4232      | 7q32          | 8.79        | 0        | 45.13   | 0.031869 |
| phosphorylase kinase, gamma 2 (testis)                        | PHKG2   | 5261      | 16p12.1-p11.2 | 8.79        | 0.048872 | 8.01    | 0.009605 |
| spondin 1, extracellular matrix protein                       | SPON1   | 10418     | 11p15.2       | 8.43        | 0.003573 | 33.87   | 0.046194 |
| Rap guanine nucleotide exchange factor (GEF) 5                | RAPGEF5 | 9771      | 7p15.3See     | 8.42        | 0.000574 | 19.43   | 0.015611 |
| trinucleotide repeat containing 9                             | TOX3    | 27324     | 16q12.1       | 8.36        | 0.025791 | 56.65   | 0.030959 |
| insulin-like growth factor binding protein 2, 36kDa           | IGFBP2  | 3485      | 2q33-q34      | 7.83        | 0.00621  | 3.09    | 0.021598 |
| death-associated protein kinase 1                             | DAPK1   | 1612      | 9q34.1        | 7.69        | 0.001319 | 15.44   | 0.014172 |
| formin homology 2 domain containing 3                         | FHOD3   | 80206     | 18q12         | 7.49        | 0.0039   | 3.15    | 0.006515 |
| scrapie responsive protein 1                                  | SCRG1   | 11341     | 4q31-q32      | 7.09        | 0.004505 | 80.65   | 0.029035 |
| potassium large conductance calcium-activated channel         | KCNMB4  | 27345     | 12q           | 7.09        | 0.0176   | 6.00    | 0.01504  |
| retinoic acid receptor, alpha                                 | RARA    | 5914      | 17q21         | 6.67        | 0.018781 | 12.21   | 0.01322  |
| neurofilament, light polypeptide 68kDa                        | NEFL    | 4747      | 8p21          | 6.6         | 0.049396 | 6.28    | 0.024439 |
| Oxoglutarate (alpha-ketoglutarate) dehydrogenase              | OGDH    | 4967      | 7p14-p13      | 6.24        | 0.046619 | 4.36    | 0.04865  |
| ADAM metallopeptidase domain 23                               | ADAM23  | 8745      | 2q33          | 5.32        | 0.002473 | 4.38    | 0.006696 |
| cadherin 2, type 1, N-cadherin (neuronal)                     | CDH2    | 1000      | 18q11.2       | 5.06        | 0.000016 | 11.21   | 0.024117 |
| immunoglobulin superfamily, member 4C                         | IGSF4C  | 199731    | 19q13.31      | 4.75        | 0.027726 | 10.07   | 0.022956 |
| ankyrin 3, node of Ranvier (ankyrin G)                        | ANK3    | 288       | 10q21         | 4.71        | 0.000627 | 4.19    | 0.000358 |
| alpha-2-macroglobulin                                         | A2M     | 2         | 12p13.3-p12.3 | 4.31        | 0.005988 | 11.49   | 0.040597 |
| inhibin, beta A (activin A, activin AB alpha polypeptide)     | INHBA   | 3624      | 7p15-p13      | 4.28        | 0.00255  | 7.16    | 0.045151 |
| neuropilin 2                                                  | NRP2    | 8828      | 2q33.3        | 4.26        | 0.000052 | 5.96    | 0.01319  |
| very low density lipoprotein receptor                         | VLDLR   | 7436      | 9p24          | 4.18        | 0.000073 | 5.83    | 0.000113 |
| sortilin-related VPS10 domain containing receptor 2           | SORCS2  | 57537     | 4p16.1        | 3.81        | 0.000836 | 8.95    | 0.015024 |
| GalNAc-T10                                                    | GALNT10 | 55568     | 5q33.2        | 3.67        | 0.001408 | 4.30    | 0.010526 |
| FXRD domain containing ion transport regulator 6              | FXRD6   | 53826     | 11q23.3       | 3.49        | 0.000074 | 22.75   | 0.012433 |
| leucine rich repeat neuronal 3                                | LRRN3   | 54674     | 7q31.1        | 3.49        | 0.004413 | 3.49    | 0.003336 |
| Interleukin 17 receptor D                                     | IL17RD  | 54756     | 3p14.3        | 3.44        | 0.003099 | 9.59    | 0.000008 |
| pleiotrophin                                                  | PTN     | 5764      | 7q33-q34      | 3.37        | 0.00091  | 4.86    | 0.005846 |
| Muscleblind-like 2 (Drosophila)                               | MBNL2   | 10150     | 13q32.1       | 3.15        | 0.024769 | 3.67    | 0.005968 |
| Microtubule-associated protein 2                              | MAP2    | 4133      | 2q34-q35      | 3.09        | 0.001547 | 4.36    | 0.010646 |
| apical protein-like (Xenopus laevis)                          | SHROOM2 | 357       | Xp22.3        | 3.06        | 0.001867 | 6.24    | 0.007724 |
| EPH receptor B3                                               | EPHB3   | 2049      | 3q21-qter     | 3.01        | 0.005485 | 8.71    | 0.002983 |
| FK506 binding protein 1B, 12.6 kDa                            | FKBP1B  | 2281      | 2p23.3        | 3.00        | 0.003688 | 4.18    | 0.032092 |

\*analysis was based on a cutoff of 3-fold increase in relative expression compared to autologous CD133- GBM cells (p &lt;0.05).



RIGHT PRIMER TTATATTGCTTGGCCATTTTACAT  
PRODUCT SIZE: 217

**MELK: maternal embryonic leucine zipper kinase**

**GeneID: 9833**

LEFT PRIMER GTTCATTGGA ACTACCAACTTGTTT  
RIGHT PRIMER TGGAAGTGAATCTAAGAAAGTCAACA  
PRODUCT SIZE: 185

**PDGFRA platelet-derived growth factor receptor, alpha**

**GeneID: 5156**

LEFT PRIMER CCTATTTTTGTGAAGAGGGACATAA  
RIGHT PRIMER CTGTGGGGATTATCACAGTTAAAAA  
PRODUCT SIZE: 157

**SOX4: SRY (sex determining region Y)-box 4**

**GeneID: 6659**

LEFT PRIMER GCAATATGCCGTGTAGAATATTTGT  
RIGHT PRIMER CAGCTGATTTTATTTCTTCTCAA  
PRODUCT SIZE: 172

**MSI1: musashi homolog 1 (Drosophila)**

**GeneID: 4440**

LEFT PRIMER TAATTGTCTGTGTGAGGTGCTTAAC  
RIGHT PRIMER GACTCAGCTCAAACGTGTAGAAAAT  
PRODUCT SIZE: 180
